# Supplementary material for: Oribatid mites show that soil food web complexity and close aboveground-belowground linkages emerged in the early Paleozoic
Source: PubMed Central journal article supplement (PMC6805910; doi:10.1038/s42003-019-0628-7), 2019-10-22
Supplement: 42003_2019_628_MOESM1_ESM.pdf [file 42003_2019_628_MOESM1_ESM.pdf]

# Supplementary Figures

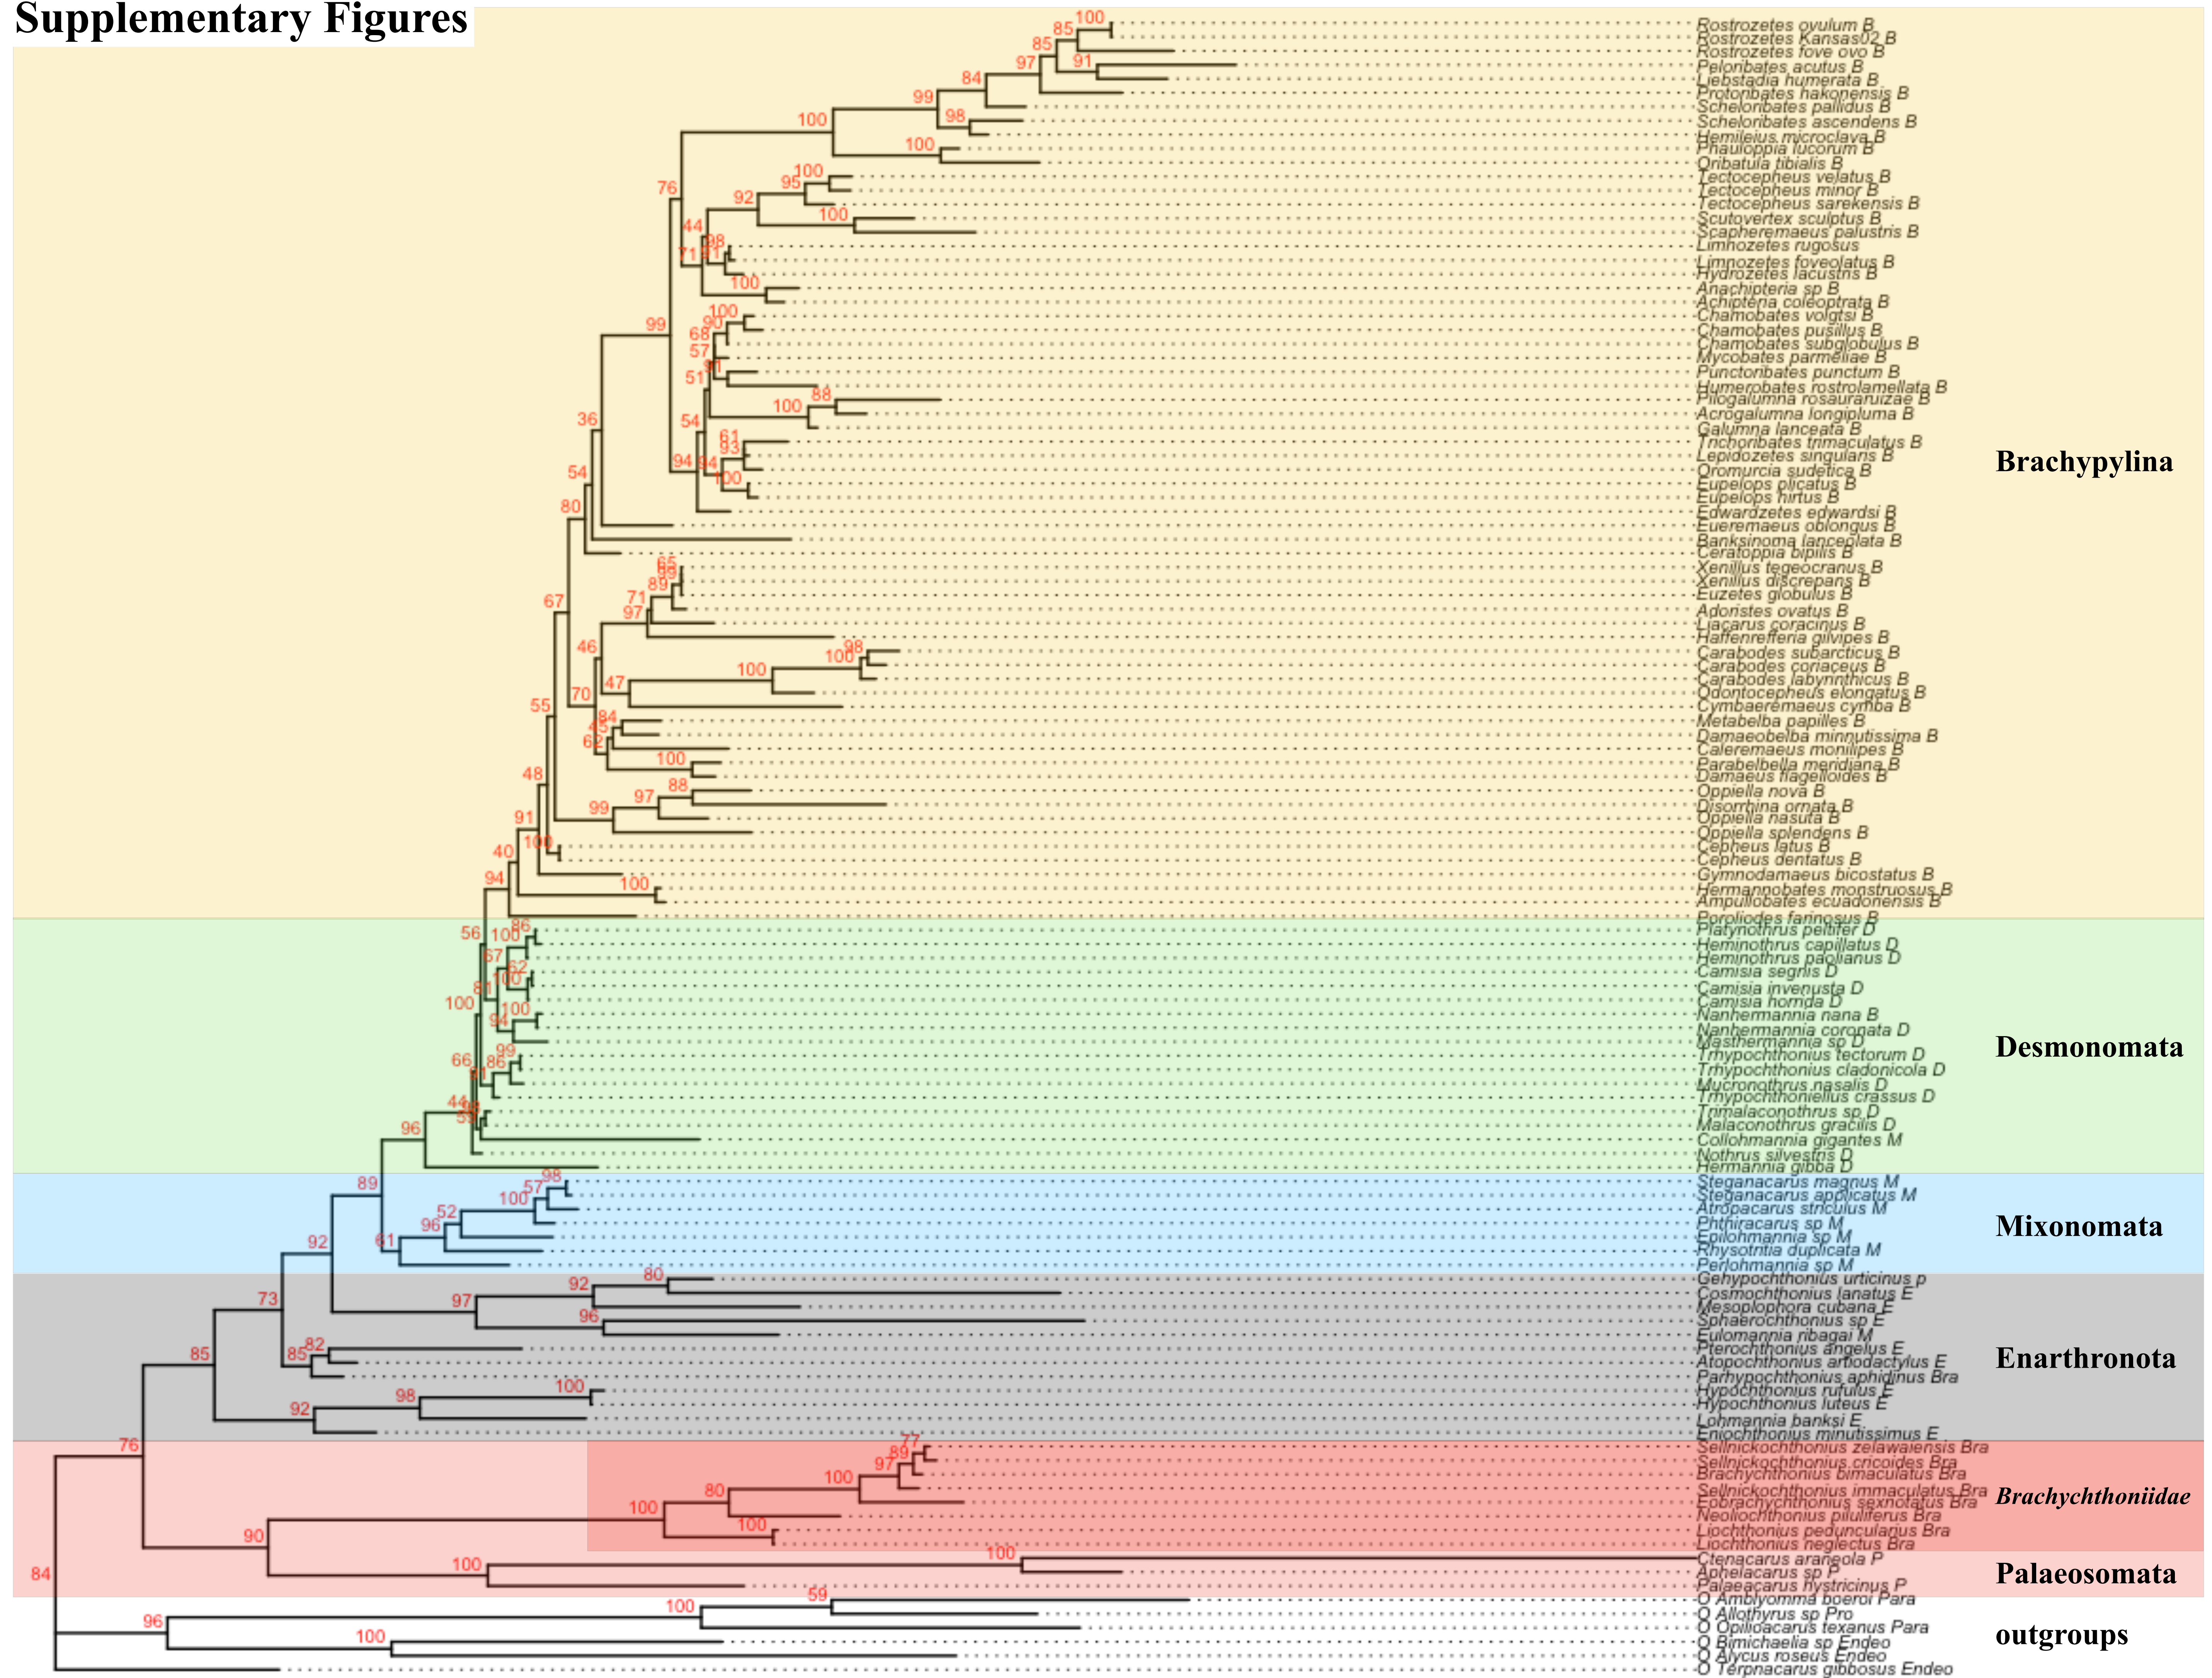

Supplementary Figure 1. Maximum Likelihood tree of the major groups of oribatid mites with 1000 bootstrap replicates.



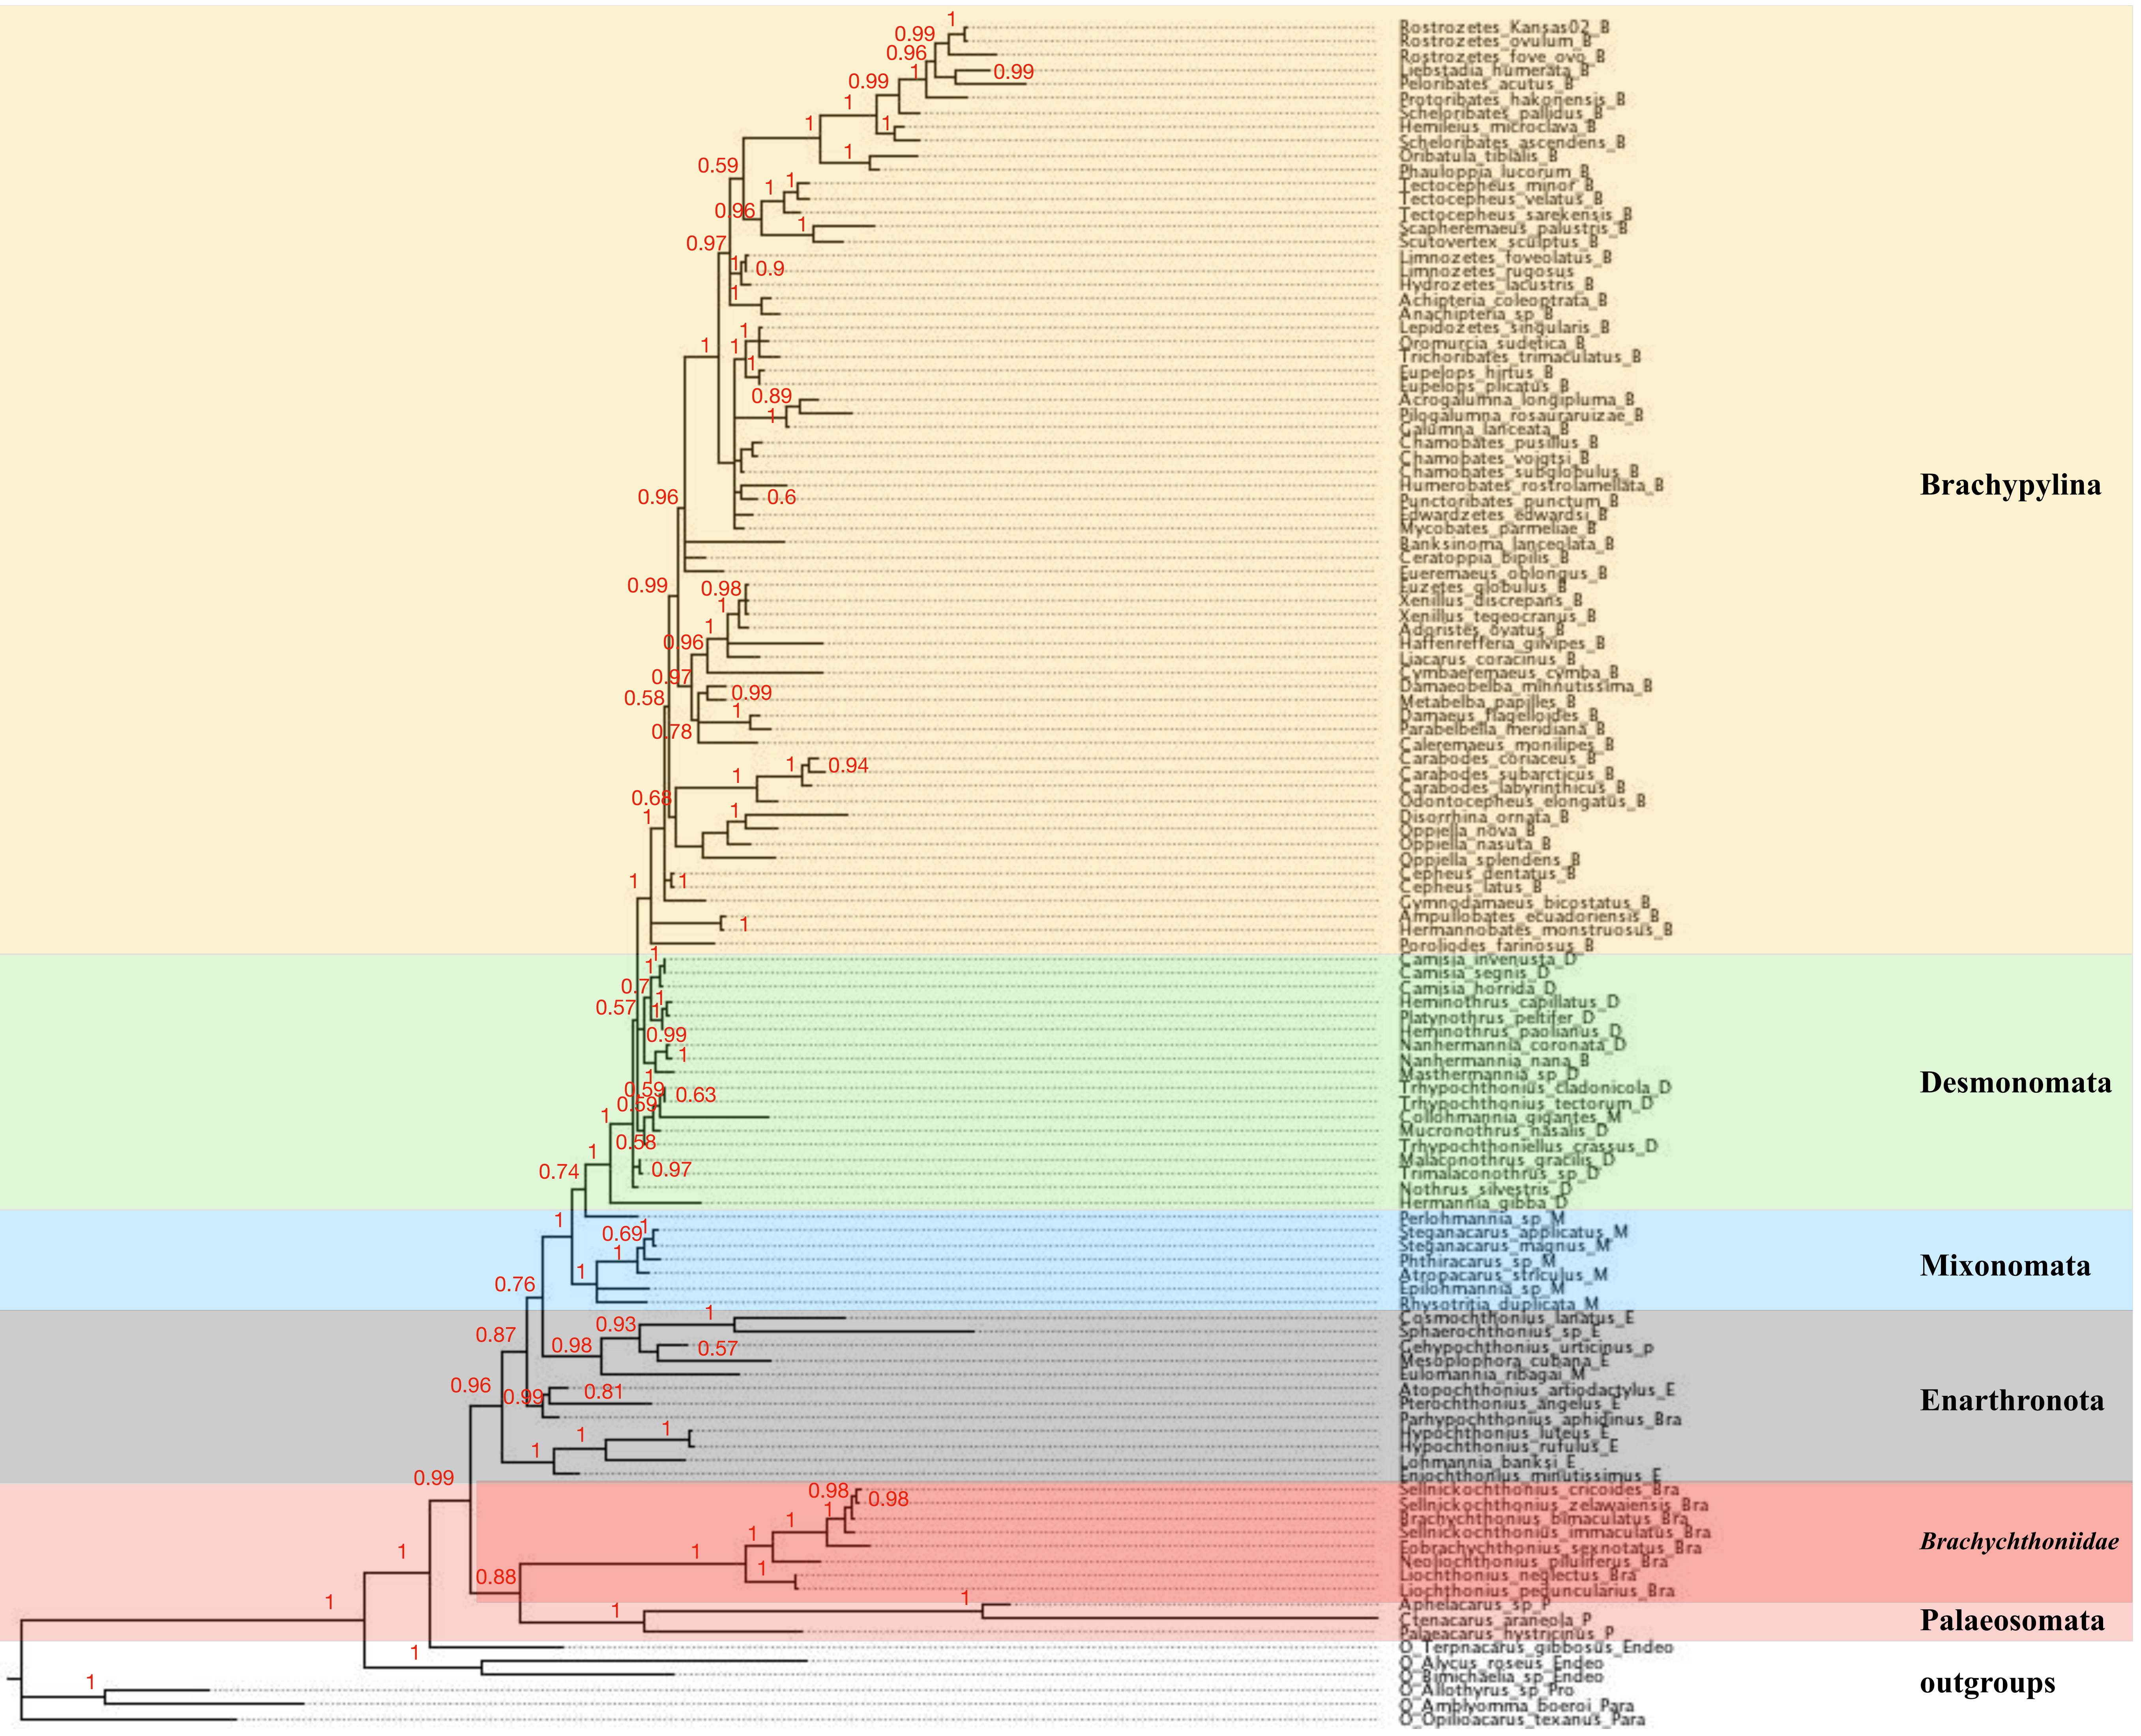

Supplementary Figure 2. Bayesian inference tree of the major groups of oribatid mites with posterior probabilities after 4 million generations.



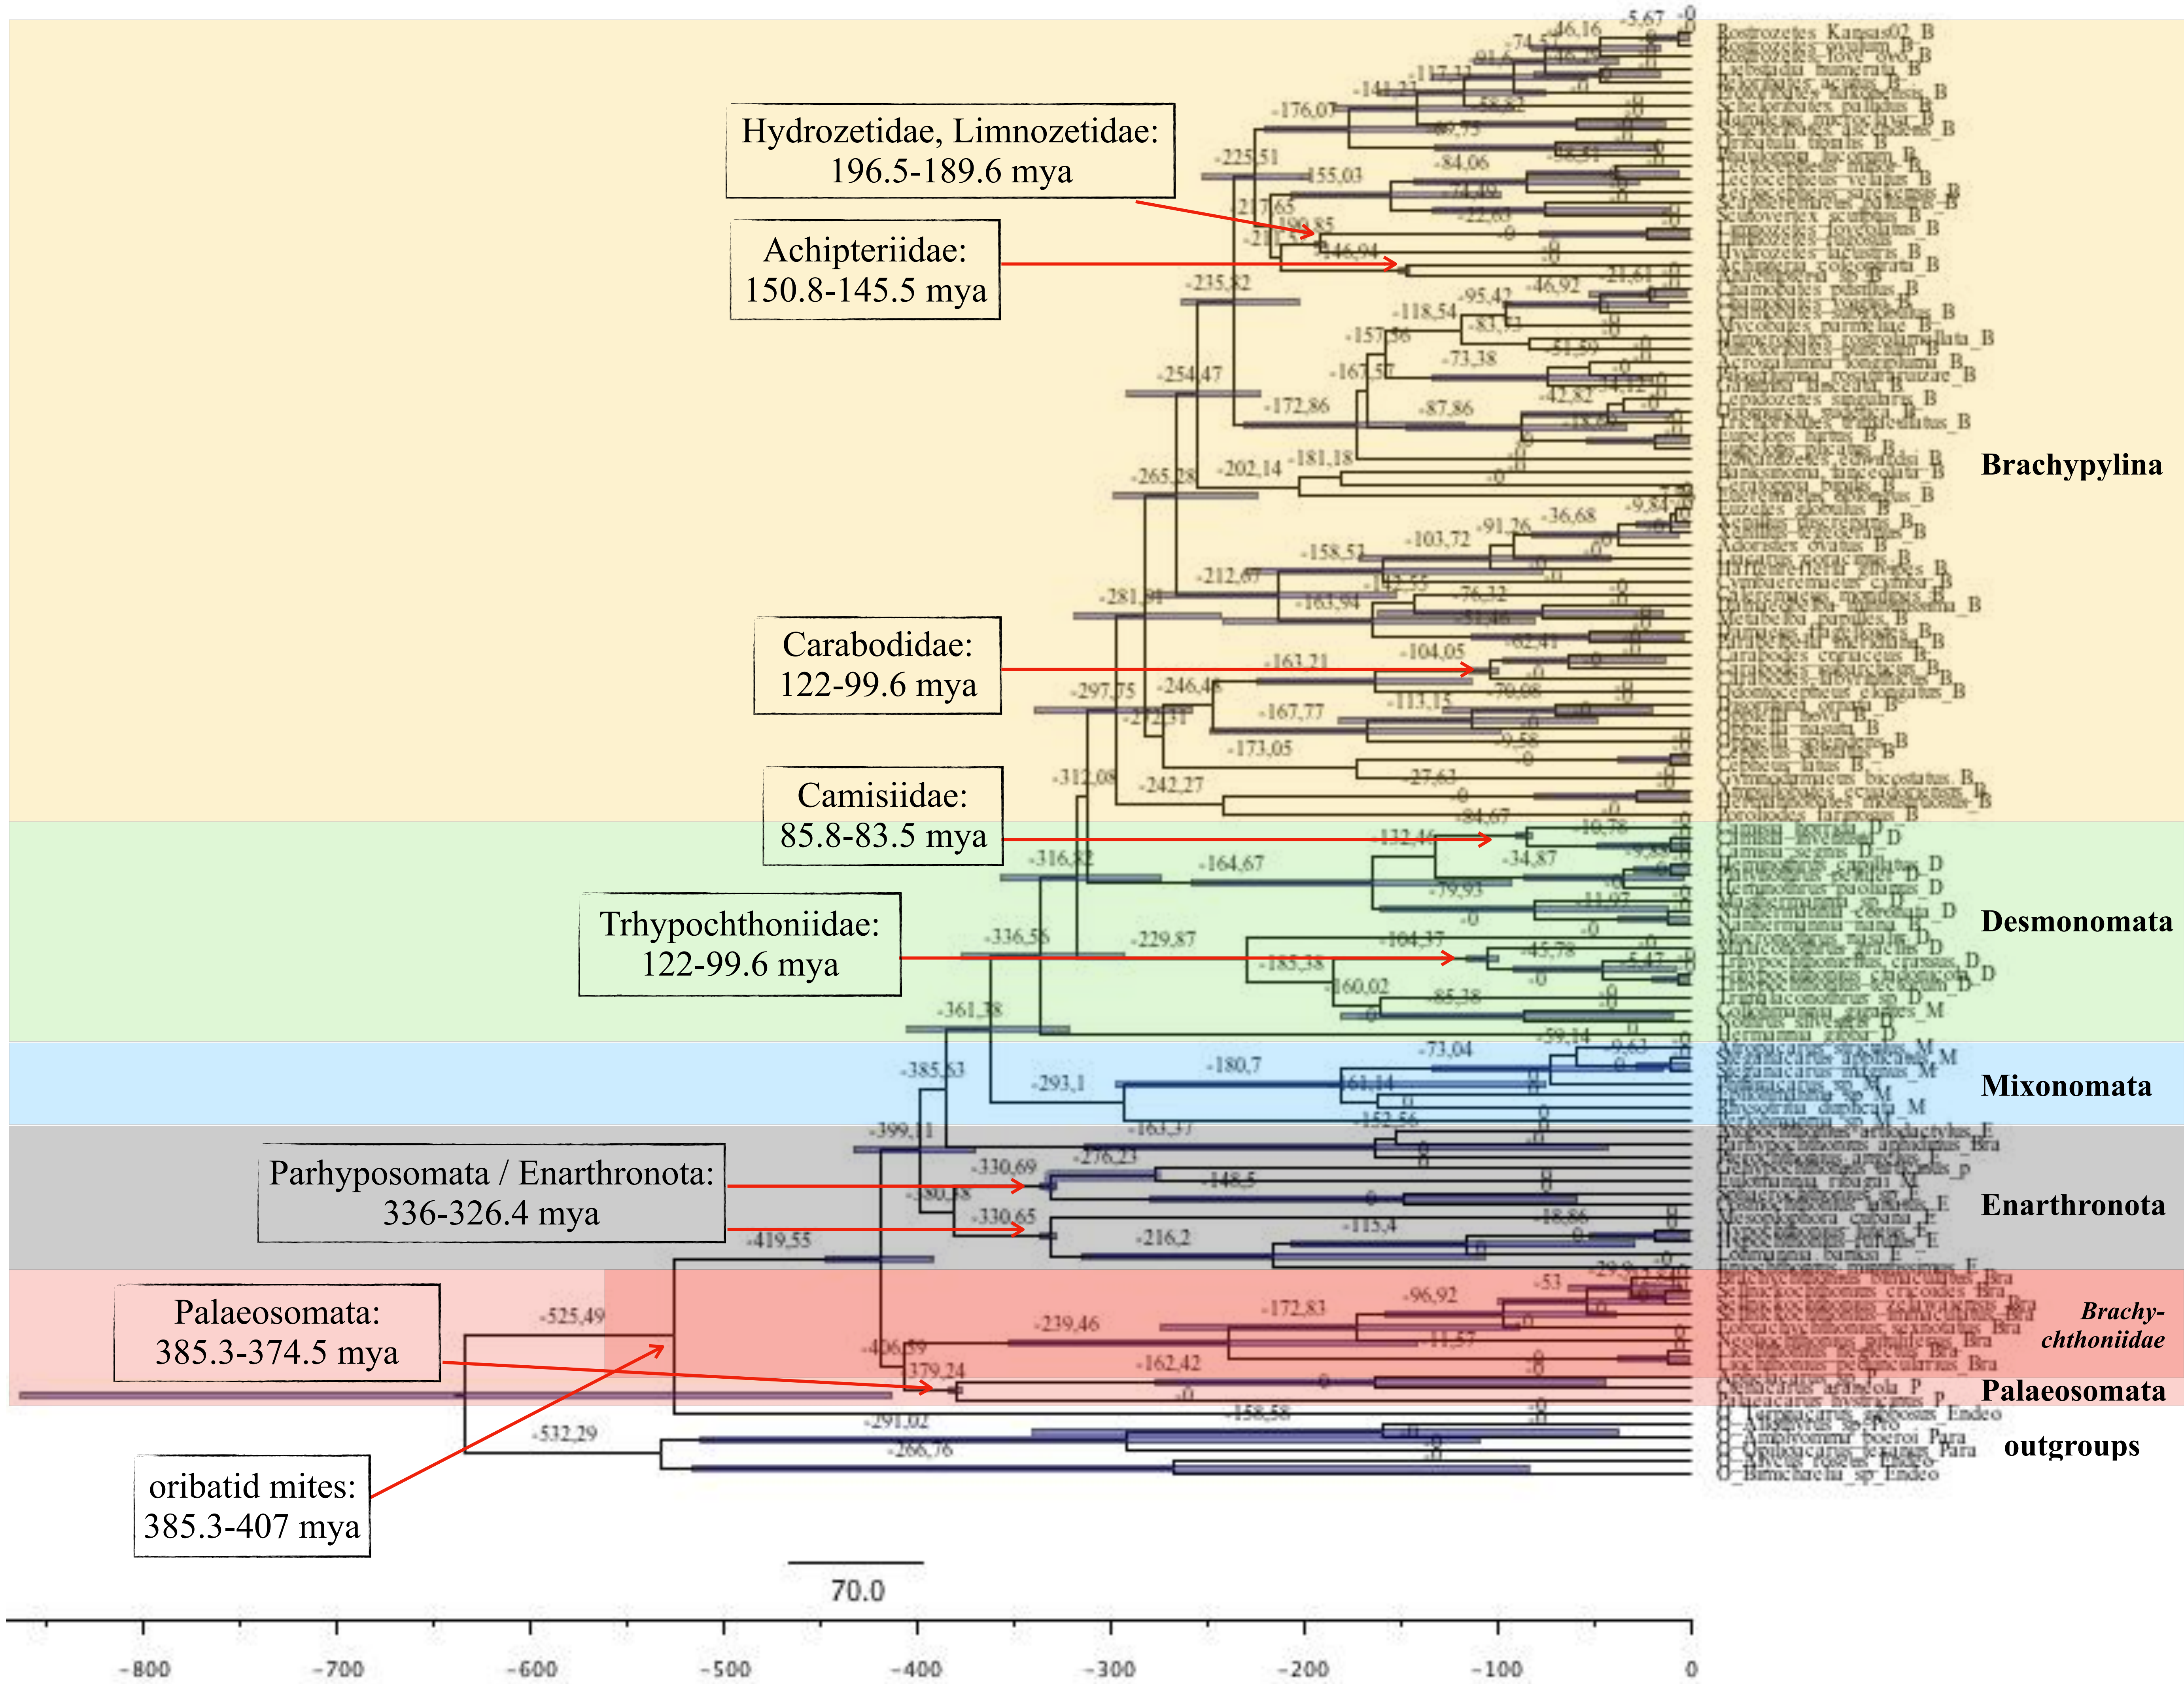

**Supplementary Figure 3. BEAST phylogeny of the major groups of oribatid mites with estimated divergence times based on 9 fossil constraints. Calibration points are shown in boxes, for details refer to Supplementary Table 2.**



**Phylogeny of oribatid mites based on 18S rDNA.** Phylogenetic trees were reconstructed with a 2,096 bp alignment of 18S rDNA of 113 oribatid mite species and three non-acariformes outgroup species (3 Parasitiformes). Maximum Likelihood (ML) analysis was performed in R using the pml function of the phangorn package, using the GTR+I+G model and 1,000 bootstrap replicates (Supplementary Figure 1). Bayesian Inference (BI) was conducted in MrBayes v3.2.6 using lset parameters nst=6 rates=invgamma and 4 million generations, all other parameters were set as default (Supplementary Figure 2).

The supercohorts Brachypylina and Desmonomata (=Nothrina) included 64 and 17 species, respectively, and were recovered with 94 and 96 percent bootstrap support, respectively (posterior probability=1 for each). The tropical genus *Rostrozetes* represents Haplozetidae, because no sequences of temperate species were available, but body sizes and stable isotope data of three European species. The monotypic superfamily Collohmanniidae clustered within *Trimalacothonidae*. A similar relationship of *Collohmannia gigantea* was also recovered in Pachl et al. (2017)<sup>1</sup>, also with equivocal node support.

The supercohort Mixonomata was recovered with 92 percent bootstrap (bs) support (posterior probability (pp)=1) and included three Phthiracaroida, one Euphthiracaroida and also included the superfamily Epilohmannioida which agrees with other studies<sup>1-3</sup>. The position of Perlohmannioida differed in the ML and BI, being basal to Mixonomata in ML and ancestral to Desmonomata in the BI tree, the later is consistent with the BI analysis of a concatenated 18S+28S rDNA dataset<sup>1</sup> and the BEAST analysis in this study (Supplementary Figure 3).

The supercohort Endeostigmata was paraphyletic in both analyses (ML and BI), resolving into three monophyletic clades. First, the superfamily Hypochthonioida (bs=92, pp=1) including two species of the genus *Hypochthonius*, *Eniochthonius* and *Lohmannia* which is in agreement with Krantz and Proctor (2009)<sup>4</sup> and with Dabert et al. (2010)<sup>5</sup> but not with Pachl et al. (2017) which group Eniochthoniidae basal to Mesoplophoridae. Second, the superfamily Protoplophoridae (bs=97, pp=1), has not been recovered in this and previous molecular phylogenies, mainly due to strong differences in taxon sampling, e.g. of 14 enarthronote taxa in Pachl et al. (2017) of which only six overlap with this study. However, according to Krantz and Proctor (2009) Cosmochthoniidae and Sphaerochthoniidae are part of the superfamily Protoplophoroidea but, in contrast, here Mesoplophoridae are not part of Hypochthoniidae. The position of Eulohmanniidae is traditionally close to Mixonomata but has been recovered as sister taxon to *Gehypochthonius* in Pachl et al. (2017). Consistent with Schaefer et al. (2010) and Pachl et al. (2017), the supercohort Parhyposomata, here represented by the genera *Gehypochthonius* and *Parhypochthonius* were not recovered but clustered among other enarthronote mites. Third, the superfamily Atopochthonioida was recovered (bs=85, pp=0.99) and included the genera *Atopochthonius* and *Pterochthonius* and additionally the parhyposomatid genus *Parhypochthonius* (Parhyposomata).

Notably, the enarthronote superfamily Brachychthonioida (bs=100, pp=1) clustered with medium support (bs=90, pp=0.88) as sister group to Palaeosomata (bs=96, pp=1) which has not been shown before. Klimov & OConnor (2013)<sup>6</sup> included one Palaeosomata and two Brachychthoniidae in their study and recovered them as sister taxa as well, but not as monophyletic. This indicates that these taxa require more attention to resolve the early-derived relationships within oribatid mites and among acariformes.

The choice of outgroups and their effects on molecular clock estimates: The topology is robust and the mean molecular divergence time estimate of ~415 mya (ranging from 371-447 mya) between [Palaeosomata + Brachychthoniidae] and [Enarthronota + remaining oribatid mites] is reasonable and predating the oldest oribatid mite fossils (i.e., Enarthronota) only by about 25 my. The phylogeny among basal Acariformes and of Acari among Chelicerata is still not resolved with the molecular data currently available, irrespective of the number of genes and the methods used (e.g. secondary structures of rDNA to improve alignment quality) to improve the phylogeny on the base of Acariformes/Acari (e.g. Pepato & Klimov 2015). This study concentrated on nodes within the group of oribatid mites, and used only Acari as outgroups to infer the basal relationships and the origin of the stem group of oribatid mites. The position of Acariformes among Chelicerates is out of the scope of this study and adding more outgroups would not change the internal topology and age of internal nodes of the investigated ingroup (i.e. oribatid mites without Astigmata).



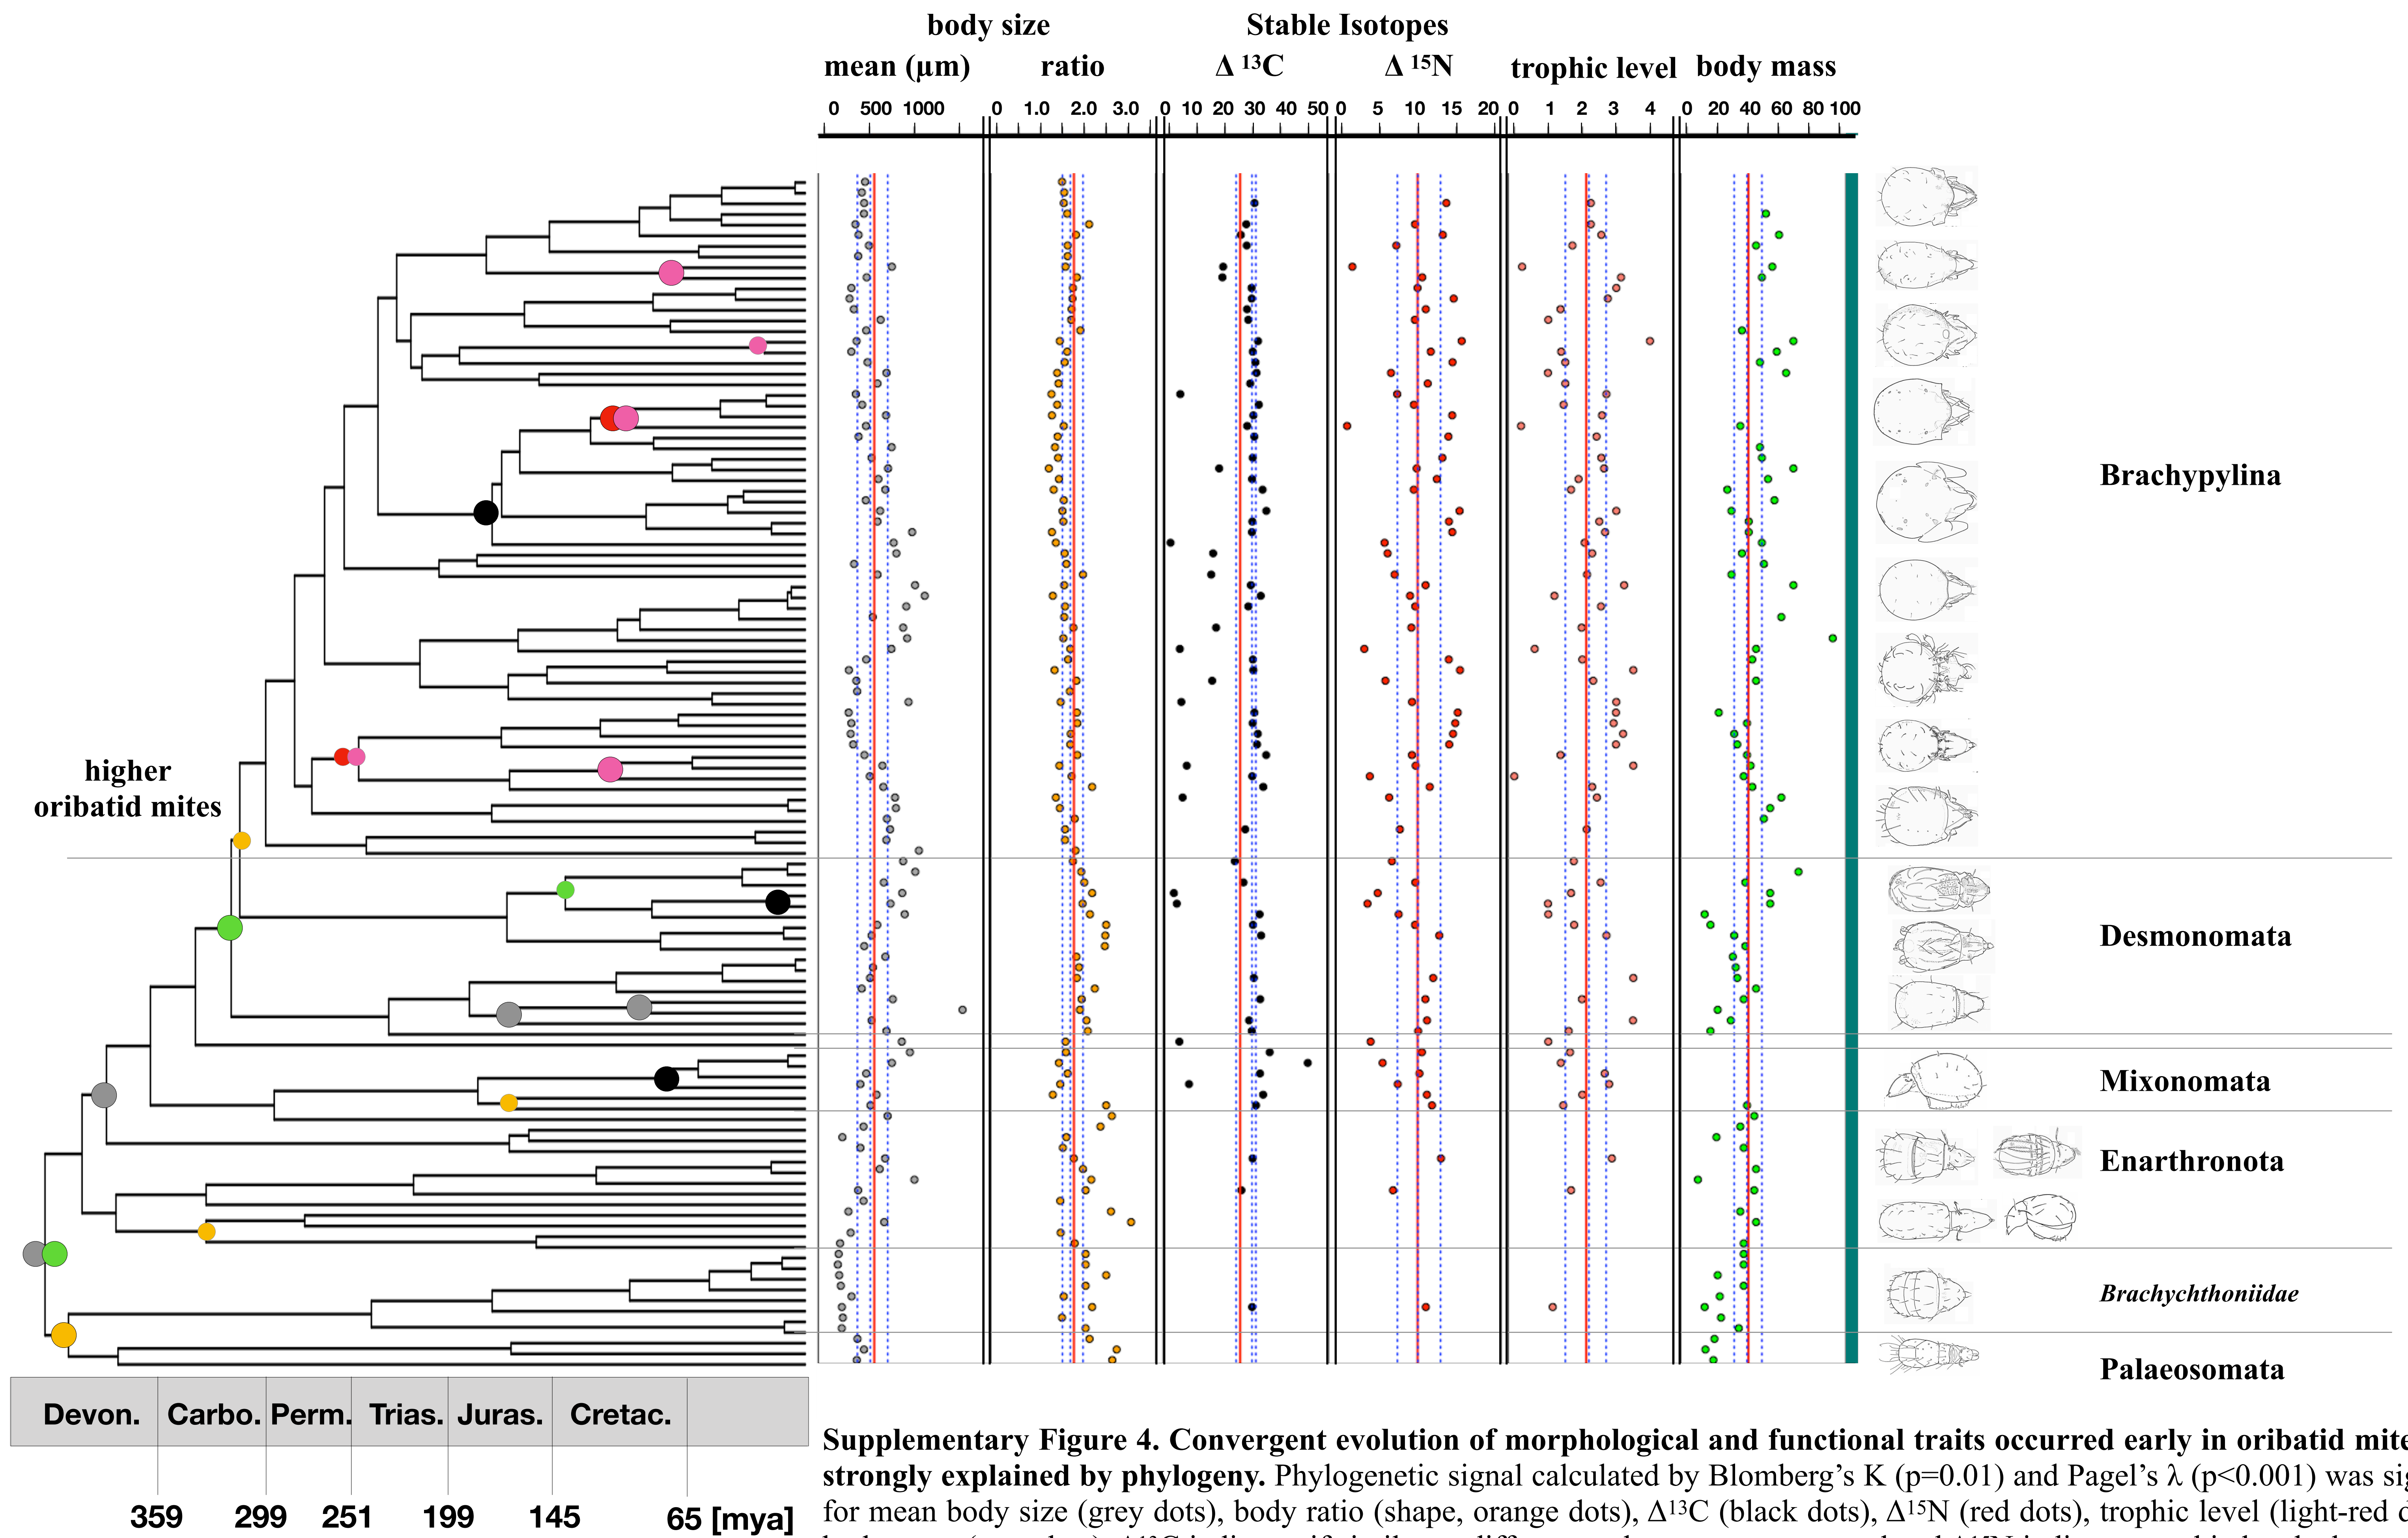

**Supplementary Figure 4. Convergent evolution of morphological and functional traits occurred early in oribatid mites and is strongly explained by phylogeny.** Phylogenetic signal calculated by Blomberg's  $K$  ( $p=0.01$ ) and Pagel's  $\lambda$  ( $p<0.001$ ) was significant for mean body size (grey dots), body ratio (shape, orange dots),  $\Delta^{13}\text{C}$  (black dots),  $\Delta^{15}\text{N}$  (red dots), trophic level (light-red dots) and body mass (green dots).  $\Delta^{13}\text{C}$  indicates if similar or different carbon sources are used and  $\Delta^{15}\text{N}$  indicates trophic levels due to nitrogen enrichment in higher levels.

Circles on nodes highlight nodes which traits significantly differ on decending clades (PIC), size of points indicate if the trait increased (large) or decreased (small). Trait distribution is mapped along the phylogeny next to species. Red lines in trait columns show the mean distribution, dashed blue lines show the 25% and 75% quantiles and median of the respective trait. Images of common body forms within each taxonomic group are provided on the right). Body mass was calculated after Caruso & Migliorini (2009)<sup>7</sup> using body length and width of drawings in Weigmann 2006<sup>8</sup>.



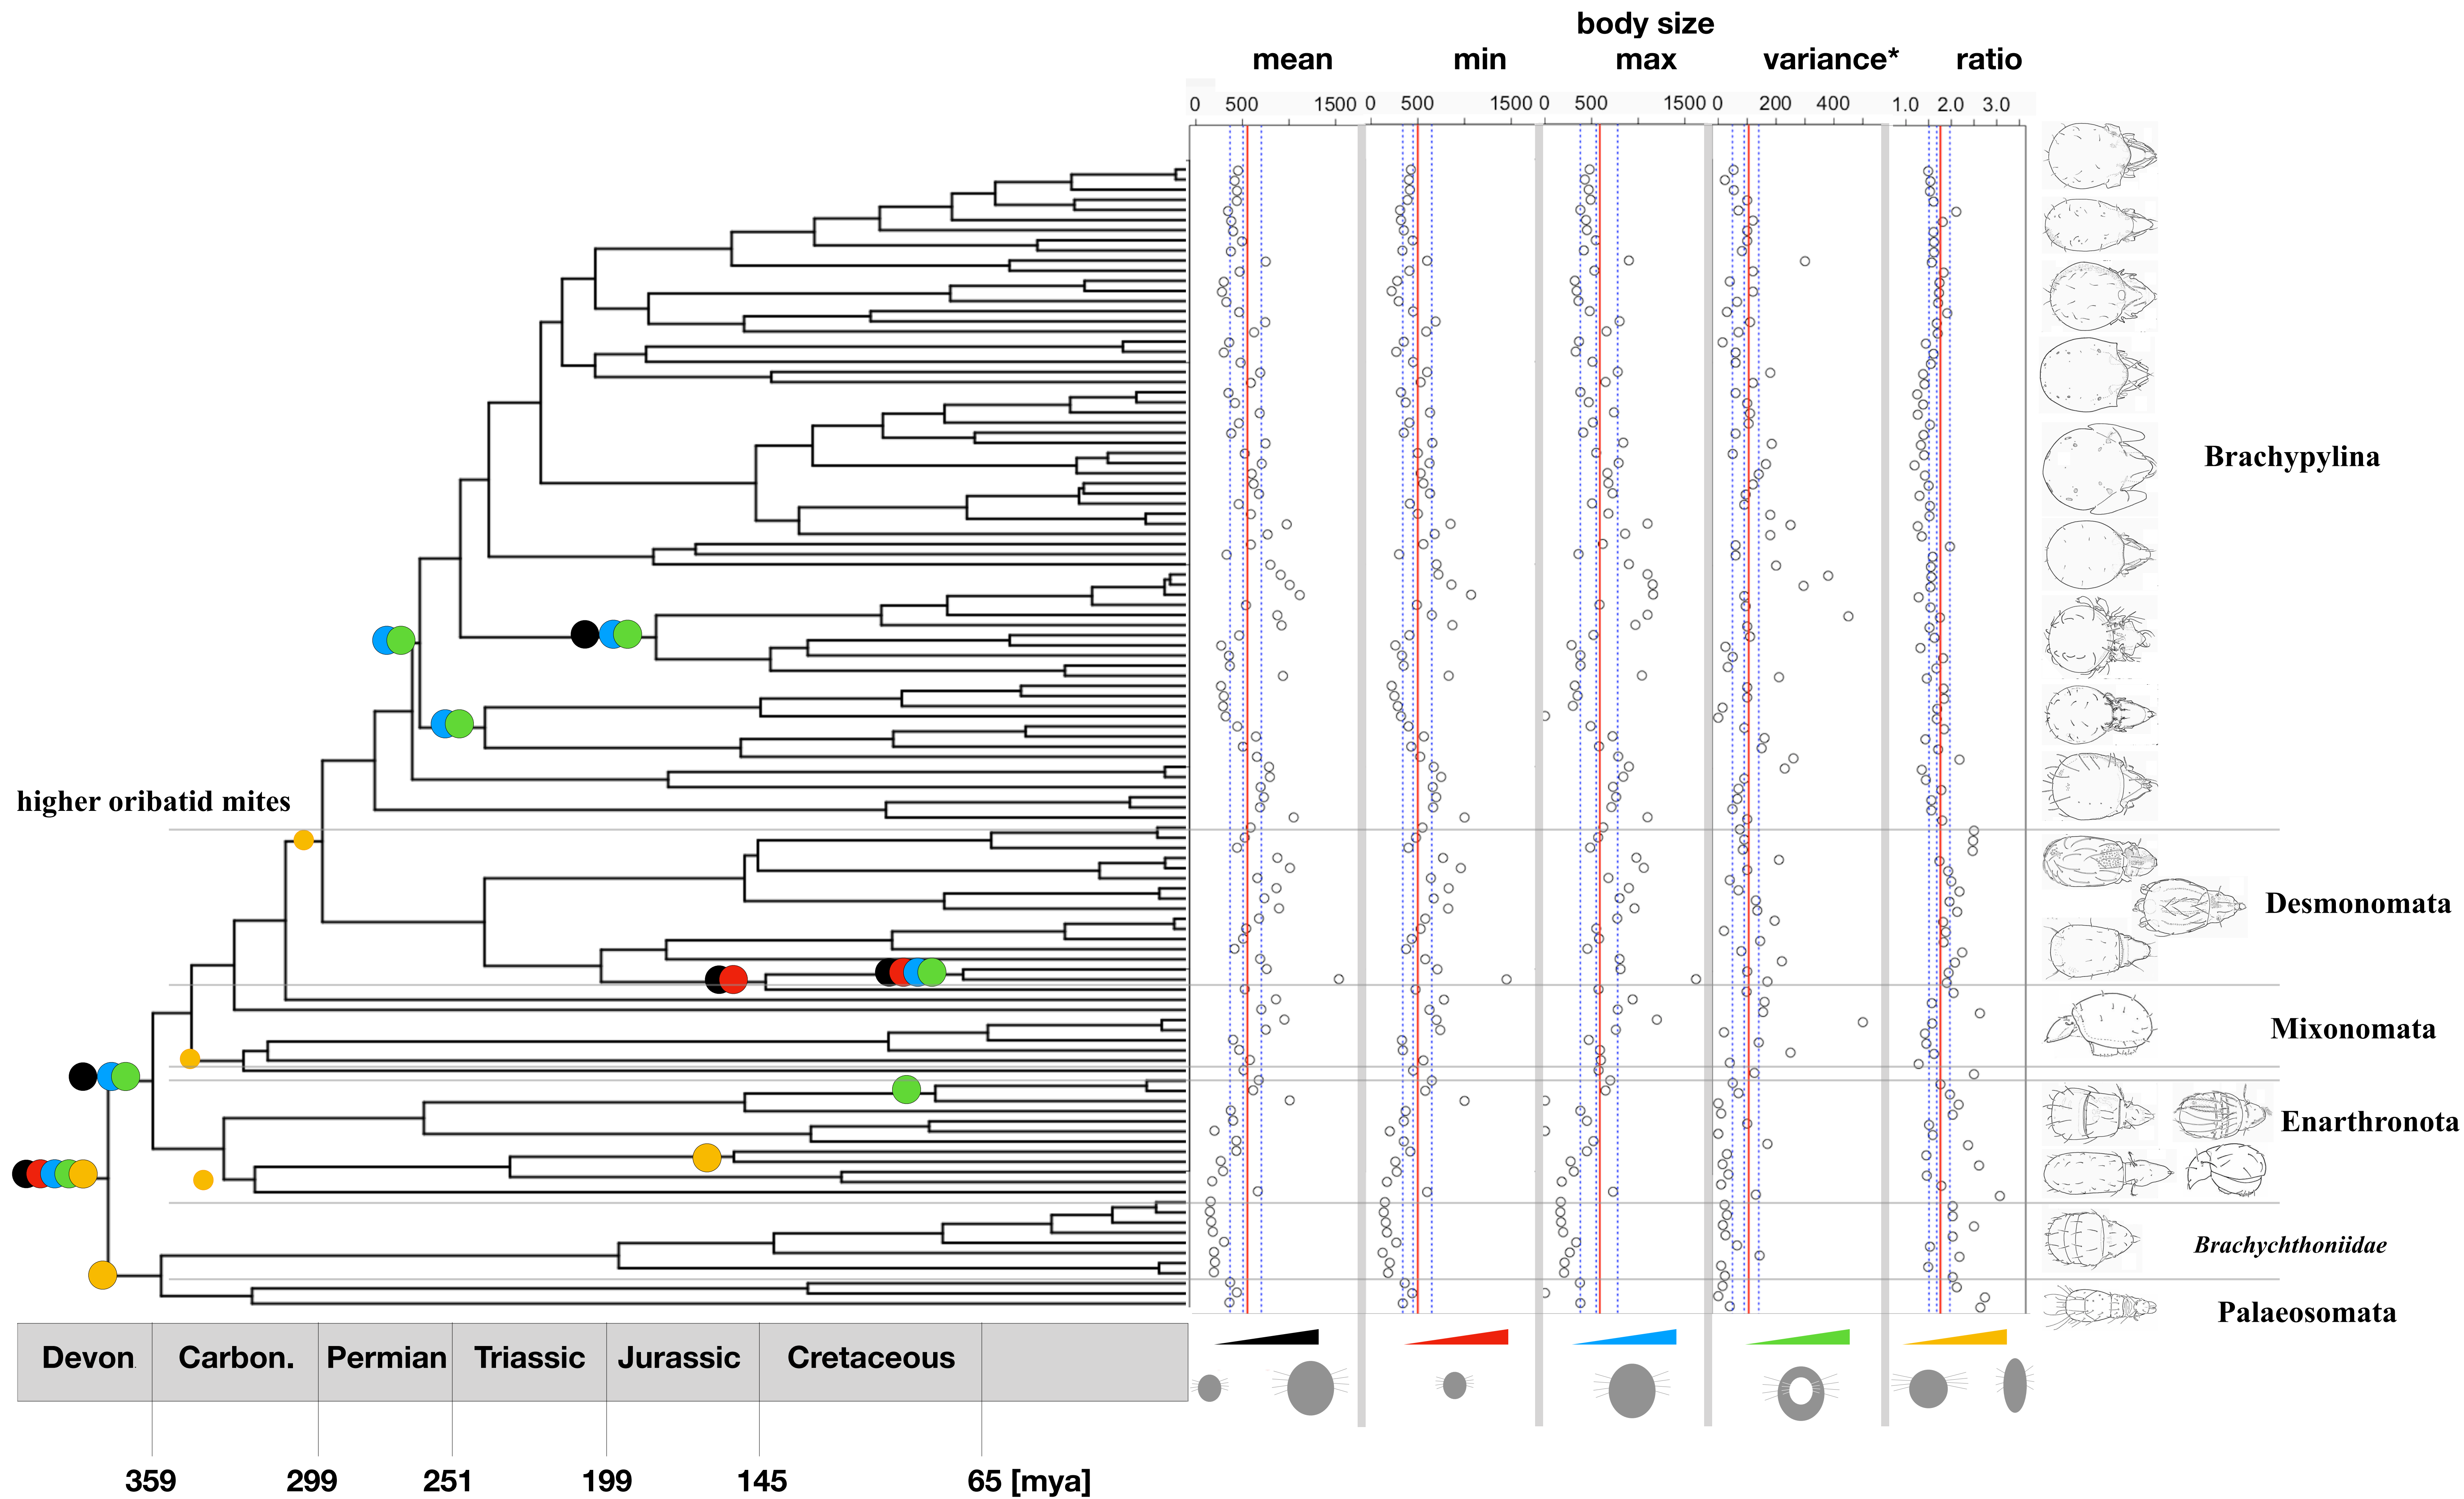

**Supplementary Figure 5. Convergent evolution of body size related traits occurred early in oribatid mites and is strongly explained by phylogeny.** Phylogenetic signal calculated by Blomberg's  $K$  ( $p=0.01$ ) and Pagel's  $\lambda$  ( $p<0.001$ ) was significant for mean ( $K=0.34$ ,  $\lambda=0.78$ ), minimum (min:  $K=0.35$ ,  $\lambda=0.79$ ), maximum size (max:  $K=0.037$ ,  $\lambda=0.73$ ), variance ( $\lambda=0.25$ ,  $p<0.05$ ) and ratio (body length/width:  $K=0.7$ ,  $\lambda=0.93$ ). Circles on nodes indicate significant trait divergence calculated by phylogenetic independent contrast (PIC) (black=mean size, red=minimum size, blue=maximum size, green= variance, orange=ratio). Trait distribution is mapped along the phylogeny next to species. Red lines in trait columns show the mean distribution, dashed blue lines show the 25% and 75% quantiles and median of the respective trait. Images of common body forms within each taxonomic group are provided on the right.); \* indicates significance only for Pagel's  $\lambda$ .

## Supplementary Tables

**Supplementary Table 1. Taxonomic overview of species included in the phylogeny and NCBI accession numbers.** All six, commonly recognized, groups (infraorders) of oribatid mites were covered<sup>9,10</sup>, and three acariform (Endeostigmata) and three parasitiform mites were included as outgroups for the phylogenetic tree. The majority of oribatid mite species belong to the infraorder Brachypylina (=higher oribatid mites) and represents a balanced taxon sampling across all infraorders, because of 10,000 described oribatid mites species, about ~8,000 belong to Brachypylina<sup>11</sup>. When available on NCBI, more than one species per genus were included when available on NCBI (highlighted in grey). The dataset included 103 oribatid mite species of Brachypylina (n=63), Desmonomata (n=17), Mixonomata (n=9), Enarthronota (n=17, including 8 Brachychthoniidae), Parhyposomata (n=2) and Palaeosomata (n=3).

| infraorder          | superfamily    | family        | genus                            | species (available as 18S sequence) | Accno (NCBI)               |
|---------------------|----------------|---------------|----------------------------------|-------------------------------------|----------------------------|
| <i>Brachypylina</i> | Achipteroidea  | Achipteriidae | Achipteria                       | <i>Achipteria_coleoprata</i>        | EF091418                   |
|                     |                | Achipteriidae | Anachipteria                     | <i>Anachipteria_sp</i>              | JQ000048                   |
|                     |                |               | Lepidozetes                      | <i>Lepidozetes_singularis</i>       | EU432193                   |
|                     | Ameroidea      | Caleremaeidae | Caleremaeus                      | <i>Caleremaeus_monilipes</i>        | MK630361                   |
|                     |                |               | Carabodidae                      | Carabodes                           | <i>Carabodes_coriaceus</i> |
|                     |                |               |                                  | <i>Carabodes_labyrinthicus</i>      | KX397629                   |
|                     |                |               |                                  | <i>Carabodes_subarcticus</i>        | EF091429                   |
|                     |                |               | Odontocephalus                   | <i>Odontocephalus_elongatus</i>     | EU432200                   |
|                     |                | Tectocephidae | Tectocephus                      | <i>Tectocephus_minor</i>            | EF093778                   |
|                     |                |               | <i>Tectocephus_sarekensis</i>    | EF093777                            |                            |
|                     |                |               | <i>Tectocephus_velatus</i>       | EF093780                            |                            |
|                     | Cepheoidea     | Cepheidae     | Cepheus                          | <i>Cepheus_dentatus</i>             | MK630354                   |
|                     |                |               |                                  | <i>Cepheus_latus</i>                | EU432206                   |
|                     | Ceratozetoidea | Ceratozetidae | Edwardzetes                      | <i>Edwardzetes_edwardsi</i>         | MH198178                   |
|                     |                |               | Oromurcia                        | <i>Oromurcia_sudetica</i>           | EU432194                   |
|                     |                |               | Trichoribates                    | <i>Trichoribates_trimaculatus</i>   | EU432195                   |
|                     |                | Chamobatidae  | Chamobates                       | <i>Chamobates_pusillus</i>          | EU432188                   |
|                     |                |               |                                  | <i>Chamobates_subglobulus</i>       | EU432190                   |
|                     |                |               |                                  | <i>Chamobates_voigtsi</i>           | EU432189                   |
|                     |                | Euzetidae     | Euzetes                          | <i>Euzetes_globulus</i>             | AF022030                   |
| Humerobatidae       |                | Humerobates   | <i>Humerobates_rostromellata</i> | EU432196                            |                            |

Supplementary Table 1 continued

|                  |                 |                |                                   |          |
|------------------|-----------------|----------------|-----------------------------------|----------|
|                  | Mycobatidae     | Mycobates      | <i>Mycobates_parmeliae</i>        | EU432191 |
|                  | Punctoribatidae | Punctoribates  | <i>Punctoribates_punctum</i>      | XX123456 |
| Cymbaeremaeoidea | Cymbaeremaeidae | Cymbaeremaeus  | <i>Cymbaeremaeus_cymba</i>        | EU432201 |
|                  |                 | Scapheremaeus  | <i>Scapheremaeus_palustris</i>    | EU433989 |
| Damaeioidea      | Belbodamaeidae  | Damaeobelba    | <i>Damaeobelba_minutissima</i>    | MH198179 |
|                  | Damaeidae       | Damaeus        | <i>Damaeus_flagelloides</i>       | KR081608 |
|                  |                 | Metabelba      | <i>Metabelba_papilles</i>         | MH198180 |
|                  |                 | Parabelbella   | <i>Parabelbella_meridiana</i>     | KR081627 |
| Eremaeioidea     | Eremaeidae      | Eueremaeus     | <i>Eueremaeus_oblongus</i>        | GQ864287 |
| Galumnoidea      | Galumnidae      | Acrogalumna    | <i>Acrogalumna_longipluma</i>     | GQ864304 |
|                  |                 | Galumna        | <i>Galumna_lanceata</i>           | EU432197 |
|                  |                 | Pilogalumna    | <i>Pilogalumna_rosauraruizae</i>  | KJ423065 |
| Gustavioidea     | Liacaridae      | Adoristes      | <i>Adoristes_ovatus</i>           | GQ864286 |
|                  |                 | Liacarus       | <i>Liacarus_coracinus</i>         | KR081619 |
|                  | Tenuialidae     | Haffenrefferia | <i>Haffenrefferia_gilvipes</i>    | MK630363 |
| Gustavioidea     | Xenillidae      | Xenillus       | <i>Xenillus_discrepans</i>        | EU432203 |
|                  |                 |                | <i>Xenillus_tegeocranus</i>       | KR081637 |
|                  | Ceratoppiidae   | Ceratoppia     | <i>Ceratoppia_bipilis</i>         | EU432204 |
| Gymnodamaeioidea | Gymnodaemaeidae | Gymnodamaeus   | <i>Gymnodamaeus_bicostatus</i>    | GQ864285 |
| Hermannielloidea | Hermanniellidae | Ambullopates   | <i>Ambullopates_ecuadoriensis</i> | KR081601 |
|                  |                 | Hermannobates  | <i>Hermannobates_monstruosus</i>  | KR081617 |
| Hydrozetoidea    | Hydrozetidae    | Hydrozetes     | <i>Hydrozetes_lacustris</i>       | EU433987 |
|                  | Limnozetididae  | Limnozetes     | <i>Limnozetes_foveolatus</i>      | KX397634 |
|                  |                 |                | <i>Limnozetes_rugosus</i>         | KX397636 |
| Licneremaeoidea  | Scutoverticidae | Scutovertex    | <i>Scutovertex_sculptus</i>       | GQ864305 |
| Liodoidea        | Liodidae        | Poroliodes     | <i>Poroliodes_farinosus</i>       | EF203779 |
| Oppioidea        | Oppiidae        | Disorrhina     | <i>Disorrhina_ornata</i>          | MH198181 |
|                  |                 | Oppiella       | <i>Oppiella_nasuta</i>            | MK630355 |
|                  |                 |                | <i>Oppiella_nova</i>              | KR081626 |
|                  |                 |                | <i>Oppiella_splendens</i>         | MK630356 |
|                  | Thyrisomidae    | Banksimona     | <i>Banksimona_lanceolata</i>      | MK630359 |



Supplementary Table 1 continued

|                    |                    |                  |                             |                                   |                                    |          |
|--------------------|--------------------|------------------|-----------------------------|-----------------------------------|------------------------------------|----------|
|                    | Oripodoidea        | Haplozetidae     | Peloribates                 | <i>Peloribates_acutus</i>         | AB818529                           |          |
|                    |                    |                  | Rostrozetes                 | <i>Rostrozetes_fove_ovo</i>       | MK630358                           |          |
|                    |                    |                  |                             | <i>Rostrozetes_Kansas02</i>       | MK630357                           |          |
|                    |                    |                  |                             | <i>Rostrozetes_ovulum</i>         | HM070342                           |          |
|                    |                    | Hemileiidae      | Hemileus                    | <i>Hemileius_microclava</i>       | KR081616                           |          |
|                    |                    | Liebstadiidae    | Liebstadia                  | <i>Liebstadia_humerata</i>        | KR081620                           |          |
|                    |                    | Oribatulidae     | Oribatula                   | <i>Oribatula_tibialis</i>         | EU433990                           |          |
|                    |                    |                  | Phauloppia                  | <i>Phauloppia_lucorum</i>         | EU432198                           |          |
|                    |                    | Protoribatidae   | Protoribates                | <i>Protoribates_hakonensis</i>    | AB818528                           |          |
|                    |                    | Scheloribatidae  | Scheloribates               | <i>Scheloribates_ascendens</i>    | EU432199                           |          |
|                    | Phenopeloidea      | Phenopelopidae   | Eupelops                    | <i>Eupelops_hirtus</i>            | EF093782                           |          |
|                    |                    |                  |                             | <i>Eupelops_plicatus</i>          | EF093782                           |          |
| <b>Desmonomata</b> | Crotonioidea       | Camisiidae       | Camisia                     | <i>Camisia_horrida</i>            | EU432207                           |          |
|                    |                    |                  |                             | <i>Camisia_invenusta</i>          | EU432208                           |          |
|                    |                    |                  |                             | <i>Camisia_segnis</i>             | EU432209                           |          |
|                    |                    |                  |                             | Heminothrus                       | <i>Heminothrus_capillatus</i>      | GQ864288 |
|                    |                    |                  |                             |                                   | <i>Heminothrus_paolianus</i>       | EF091423 |
|                    |                    |                  |                             |                                   | <i>Platynothrus_peltifer</i>       | EF091422 |
|                    |                    | Nothridae        | Nothrus                     | <i>Nothrus_silvestris</i>         | EF091425                           |          |
|                    | Hermannioidea      | Hermannidae      | Hermannia                   | <i>Hermannia_gibba</i>            | EF091426                           |          |
|                    | Nanhermannioidea   | Nanhermanniidae  | Masthermannia               | <i>Masthermannia_sp</i>           | KY922217                           |          |
|                    |                    |                  |                             | Nanhermannia                      | <i>Nanhermannia_coronata</i>       | EF091421 |
|                    |                    |                  |                             |                                   | <i>Nanhermannia_nana</i>           | KR081624 |
|                    | Trhypochthonioidea | Malaconothridae  | Malaconothrus               | <i>Malaconothrus_gracilis</i>     | EF091424                           |          |
| Trimalaconothrus   |                    |                  |                             | <i>Trimalaconothrus_sp</i>        | EU43221                            |          |
| Trhypochthoniidae  |                    | Mucronothrus     | <i>Mucronothrus_nasalis</i> | EF081299                          |                                    |          |
|                    |                    |                  | Trhypochthoniellus          | <i>Trhypochthoniellus_crassus</i> | EF081300                           |          |
|                    |                    |                  | Trhypochthoniidae           | Trhypochthonius                   | <i>Trhypochthonius_cladonicola</i> | JQ000047 |
|                    |                    |                  |                             | <i>Trhypochthonius_tectorum</i>   | AF022041                           |          |
| <b>Mixonomata</b>  |                    | Collohmannioidae | Collohmanniidae             | Cohllohmanna                      | <i>Collohmanna_gigantes</i>        | KR081604 |
|                    | Epilohmannioidea   | Epilohmanniidae  | Epilohmannia                | <i>Epilohmannia_sp</i>            | EU432213                           |          |
|                    | Eulohmannioidea    | Eulohmanniidae   | Eulohmannia                 | <i>Eulohmannia_ribagai</i>        | EU432211                           |          |
|                    | Euphtiracaroidae   | Euphtiracaridae  | Rhysotritia                 | <i>Rhysotritia_duplicata</i>      | EF091417                           |          |
|                    | Perlohmannioidea   | Perlohmanniidae  | Perlohmannia                | <i>Perlohmannia_sp</i>            | EU432212                           |          |
|                    | Phthiracaroidae    | Phthiracaridae   | Phthiracarus                | <i>Phthiracarus_sp</i>            | KR081629                           |          |
|                    |                    |                  |                             | Atropacarus                       | <i>Atropacarus_striculus</i>       | EF091416 |
|                    |                    |                  |                             | Steganacarus                      | <i>Steganacarus_applicatus</i>     | GQ864301 |
|                    |                    |                  | <i>Steganacarus_magnus</i>  | AF022040                          |                                    |          |



**Supplementary Table 1** continued

|                                                         |                    |                    |                                        |                                     |          |
|---------------------------------------------------------|--------------------|--------------------|----------------------------------------|-------------------------------------|----------|
| <b><i>Enarthronota</i></b>                              | Atopochthonoidea   | Atopochthoniidae   | Atopochthonius                         | <i>Atopochthonius_artiodactylus</i> | EU432216 |
|                                                         |                    | Pterochthoniidae   | Pterochthonius                         | <i>Pterochthonius_angelus</i>       | EU432214 |
|                                                         | Brachychthonoidea  | Brachychthoniidae  | Brachychthonius                        | <i>Brachychthonius_bimaculatus</i>  | MK630360 |
|                                                         |                    |                    | Eobrachychthonius                      | <i>Eobrachychthonius_sexnotatus</i> | MK630362 |
|                                                         |                    | Liochthonius       |                                        | <i>Liochthonius_neglectus</i>       | MK630364 |
|                                                         |                    |                    |                                        | <i>Liochthonius_peduncularius</i>   | MK630365 |
|                                                         |                    | Neoliochthonius    |                                        | <i>Neoliochthonius_piluliferus</i>  | MK630366 |
|                                                         |                    | Sellnickochthonius |                                        | <i>Sellnickochthonius_cricoides</i> | MK630367 |
|                                                         |                    |                    | <i>Sellnickochthonius_immaculatus</i>  | MN065455                            |          |
|                                                         |                    |                    | <i>Sellnickochthonius_zelawaiensis</i> | MH198174                            |          |
|                                                         | Cosmochthonoidea   | Cosmochthoniidae   | Cosmochthonius                         | <i>Cosmochthonius_lanatus</i>       | JN585919 |
|                                                         |                    | Sphaerochthoniidae | Sphaerochthonius                       | <i>Sphaerochthonius_sp</i>          | JN585916 |
|                                                         | Hypochthonoidea    | Eniochtoniidae     | Eniochthonius                          | <i>Eniochthonius_minutissimus</i>   | EF091428 |
|                                                         |                    | Hypochthoniidae    | Hypochthonius                          | <i>Hypochthonius_luteus</i>         | EU152475 |
| <i>Hypochthonius_rufulus</i>                            |                    |                    |                                        | EF091427                            |          |
| Lohmannioidea                                           | Lohmanniidae       | Lohmannia          | <i>Lohmannia_banksi_E</i>              | AF022036                            |          |
| Mesoplophoroidea                                        | Mesoplophoridae    | Mesoplophora       | <i>Mesoplophora_cubana</i>             | EU432217                            |          |
| <b><i>Parhyposomata</i></b>                             | Parhypochthonoidea | Gehypochthoniidae  | Gehypochthonius                        | <i>Gehypochthonius_urticinus</i>    | EU433994 |
|                                                         |                    | Parhypochthoniidae | Parhypochthonius                       | <i>Parhypochthonius_aphidinus</i>   | EU432215 |
| <b><i>Palaeosomata</i></b>                              | Ctenacaroida       | Aphelacaridae      | Aphelacarus                            | <i>Aphelacarus_sp</i>               | DQ648879 |
|                                                         |                    | Ctenacaridae       | Ctenacarus                             | <i>Ctenacarus_araneola</i>          | EU433991 |
|                                                         | Palaeacaroida      | Palaeacaridae      | Palaeacarus                            | <i>Palaeacarus_hystricinus</i>      | EF204472 |
| <b><i>Acariformes</i></b><br><b><i>outgroups</i></b>    | Endeostigmata      | Alycidae           | Alycus                                 | <i>Alycus_roseus</i>                | GQ864294 |
|                                                         |                    |                    | Bimichaelia                            | <i>Bimichaelia_sp</i>               | GQ864295 |
|                                                         |                    | Terpnacaridae      | Terpnacarus                            | <i>Terpnacarus_gibbosus</i>         | AY620904 |
| <b><i>Parasitiformes</i></b><br><b><i>outgroups</i></b> | Holothyrida        | Holothyroidea      | Allothyrus                             | <i>Allothyrus_sp</i>                | AF018655 |
|                                                         | Ixodidae           | Amblyomminae       | Amblyomma                              | <i>Amblyomma_boeroi</i>             | FJ464420 |
|                                                         | Opilioacariformes  | Opilioacarida      | Opilioacarus                           | <i>Opilioacarus_texasus</i>         | AF115375 |



Supplementary Table 2. Taxonomic assignment, geological age of fossil oribatid mites, and prior settings used in the molecular clock analysis.

|                              | family                               | species (available as 18S sequence)                                                                                                       | fossil specimen                      | geological epoch | time (mya)  | reference                                  | exponential calibration prior in BEAST |
|------------------------------|--------------------------------------|-------------------------------------------------------------------------------------------------------------------------------------------|--------------------------------------|------------------|-------------|--------------------------------------------|----------------------------------------|
| Brachypylina                 | Achipteriidae                        | <i>Achipteria_coleoprata</i><br><i>Anachipteria_sp</i>                                                                                    | <i>Achipteria (?) obscura</i>        | Tithonian        | 150.8-145.5 | Krivolutsky & Krassilov 1977 <sup>12</sup> | mean:2.0<br>offset:145.0               |
|                              | Carabodidae                          | <i>Carabodes_coriaceus</i><br><i>Carabodes_labyrinthicus</i><br><i>Carabodes_subarcticus</i>                                              | <i>Cretaceobodes martinezae</i>      | Albian           | 122-99.6    | Arillo et al. 2008 <sup>13</sup>           | mean:7.0<br>offset:99.0                |
|                              | Hydrozetidae<br>Limnozeteidae        | <i>Hydrozetes_lacustris</i><br><i>Limnozetes_foveolatus</i><br><i>Limnozetes_rugosus</i>                                                  | <i>Hydrozetes sp.</i>                | Sinemurian       | 196.5-189.6 | Sivhead & Wallwork 1978 <sup>14</sup>      | mean:2.0<br>offset:189.0               |
| Desmonomata                  | Camisiidae                           | <i>Camisia_horrida</i><br><i>Camisia_invenusta</i><br><i>Camisia_segnis</i>                                                               | <i>Eocamisia sukatshevae</i>         | Santonian        | 85.8-83.5   | Bulanova-Zachvatkina 1974 <sup>15</sup>    | mean:3.0<br>offset:82.0                |
|                              | Trhypochthoniidae                    | <i>Mucronothrus_nasalis</i><br><i>Trhypochthoniellus_crassus</i><br><i>Trhypochthonius_cladonicola</i><br><i>Trhypochthonius_tectorum</i> | <i>Trhypochthonius lopezvallei</i>   | Albian           | 122-99.6    | Arillo et al. 2012 <sup>16</sup>           | mean:7.0<br>offset:99.0                |
| Parhyposomata / Enarthronota | Cosmochthoniidae                     | <i>Cosmochthonius_lanatus</i>                                                                                                             | <i>Carbochthonius antrimensis</i>    | Brigantian       | 336-326.4   | Subías & Arillo 2002 <sup>17</sup>         | mean:3.0<br>offset:328.0               |
|                              | Gehypochthoniidae                    | <i>Gehypochthonius_urticinus</i>                                                                                                          | <i>Gehypochthonimimus hibernicus</i> |                  |             |                                            |                                        |
|                              | Sphaerochthoniidae<br>Eulohmanniidae | <i>Sphaerochthonius_sp</i><br><i>Eulohmannia_ribagai</i>                                                                                  |                                      |                  |             |                                            |                                        |



**Supplementary Table 2** continued

|                       |                 |                                                             |                                               |                |             |                                                                             |                          |
|-----------------------|-----------------|-------------------------------------------------------------|-----------------------------------------------|----------------|-------------|-----------------------------------------------------------------------------|--------------------------|
| <b>Enarthro-nota</b>  | Hypochthoniidae | <i>Hypochthonius_luteus</i><br><i>Hypochthonius_rufulus</i> | <i>Paleohypochthonius</i><br><i>jerami</i>    |                |             |                                                                             |                          |
|                       | Mesoplophoridae | <i>Mesoplophora_cubana</i>                                  | <i>Archaeoplophora_bella</i>                  | Brigantian     | 336-326.4   | Subías & Arillo<br>2002 <sup>17</sup>                                       | mean:3.0<br>offset:328.0 |
|                       | Eniochtoniidae  | <i>Eniochthonius_minutissimus</i>                           |                                               |                |             |                                                                             |                          |
|                       | Lohmanniidae    | <i>Lohmannia_banksi</i>                                     |                                               |                |             |                                                                             |                          |
| <b>Palaeoso-mata</b>  | Aphelacaridae   | <i>Aphelacarus_sp</i>                                       | <i>Monoaphelacarus</i><br><i>carboniferus</i> |                |             |                                                                             |                          |
|                       | Ctenacaridae    | <i>Ctenacarus_araneola</i>                                  | <i>Ctenacaronychus</i><br><i>nortoni</i>      | lower Frasnian | 385.3-374.5 | Subías & Arillo<br>2002 <sup>17</sup> , Norton et<br>al. 1988 <sup>18</sup> | mean:3.0<br>offset:377.0 |
|                       | Palaeacaridae   | <i>Palaeacarus_hystricinus</i>                              | <i>Paleoctenacarus</i><br><i>simmsi</i>       |                |             |                                                                             |                          |
| <b>oribatid mites</b> |                 |                                                             |                                               | Emsian         | 407-397.5   |                                                                             |                          |
|                       |                 |                                                             |                                               | Givetian       | 385.3-391.8 | Shear et al. 1984 <sup>19</sup>                                             | mean:5.0<br>offset:384.0 |



**Supplementary Table 3. Fossil data that decreased the likelihoods and posterior probabilities and were not used in the final molecular clock analyses. Fossil dates** either strongly underestimated the age of species or could not be applied because too few specimens of the genus or family were present in the dataset.

|                 | family                       | species (available as 18S sequence) | fossil specimen                                                             | geological epoch                                                | time (mya)                       | reference                            |                            |
|-----------------|------------------------------|-------------------------------------|-----------------------------------------------------------------------------|-----------------------------------------------------------------|----------------------------------|--------------------------------------|----------------------------|
| Brachyphyllina  | Cepheoidea                   | <i>Cepheus dentatus</i>             | <i>Eupterotegaeus bitranslamellatus</i>                                     | Albian                                                          | 122-99.6                         | Arillo et al. 2012 <sup>16</sup>     |                            |
|                 |                              | <i>Cepheus latus</i>                | <i>Ommatocepheus nortoni</i>                                                |                                                                 |                                  |                                      |                            |
|                 | Cymbaeremaeidae              | <i>Cymbaeremaeus cymba</i>          | <i>Ametroproctus valeiae</i>                                                | Albian                                                          | 122-99.6                         | Arillo et al. 2012 <sup>16</sup>     |                            |
|                 |                              | <i>Scapheremaeus palustris</i>      | <i>Scapheremaeus</i>                                                        | late Eocene                                                     | 42-37                            | O'Dowd et al. 1991 <sup>20</sup>     |                            |
|                 | Eremaeidae                   | <i>Eueremaeus oblongus</i>          | <i>Eremaeus denaius</i>                                                     | Oligocene/Miocene                                               | 25                               | Woolley 1971 <sup>21</sup>           |                            |
|                 | Galumnidae                   | <i>Acrogalumna longipluma</i>       |                                                                             | middle Eocene                                                   | 42-49                            | O'Dowd et al. 1991 <sup>20</sup>     |                            |
|                 |                              | <i>Galumna lanceata</i>             |                                                                             |                                                                 |                                  |                                      |                            |
|                 |                              | <i>Pilogalumna rosauraruizae</i>    |                                                                             |                                                                 |                                  |                                      |                            |
|                 | Oppiidae                     | <i>Dissorhina ornata</i>            |                                                                             | <i>Dissorhina paleokrasica</i> n. sp.,<br><i>D. nuda</i> n. sp. | late Pliocene                    | 3.8, 2.7                             | Mico 2015 <sup>22</sup>    |
|                 |                              |                                     | <i>Oppiella nasuta</i><br><i>Oppiella nova</i><br><i>Oppiella splendens</i> | <i>Oppia hurdi</i>                                              | Oligocene/Miocene                | 25                                   | Woolley 1971 <sup>21</sup> |
| Scutoverticidae |                              | <i>Scutovertex sculptus</i>         | <i>Hypovertex hispanicus</i><br>( <i>Scutoverticidae</i> )                  | Albian                                                          | 122-99.6                         | Arillo et al. 2012 <sup>16</sup>     |                            |
|                 | <i>Phauloppia lucorum</i>    | <i>Phauloppia</i>                   | middle Eocene                                                               | 42-49                                                           | O'Dowd et al. 1991 <sup>20</sup> |                                      |                            |
| Des.            | Hermanniiidae                | <i>Hermannia gibba</i>              | <i>Hermannia sellnicki</i> n. sp.                                           | Lutetian                                                        | ~44                              | Norton 2006 <sup>23</sup>            |                            |
| Mixonomata      | Collohmanniidae              | <i>Collohmanna gigantes</i>         | <i>Collohmanna schusteri</i> n. sp.                                         | Lutetian                                                        | ~44                              | Norton 2006 <sup>23</sup>            |                            |
|                 | Phthiracaroida               | <i>Phthiracarus</i> sp              |                                                                             | Carboniferous trace fossils (coprolites)                        | 359.2-299                        | Labandeira et al. 1997 <sup>24</sup> |                            |
|                 |                              | <i>Atropacarus striculus</i>        |                                                                             |                                                                 |                                  |                                      |                            |
|                 |                              | <i>Steganacarus applicatus</i>      |                                                                             |                                                                 |                                  |                                      |                            |
|                 |                              | <i>Steganacarus magnus</i>          |                                                                             |                                                                 |                                  |                                      |                            |
| Euphtiracarid.  | <i>Rhysotritia duplicata</i> |                                     |                                                                             |                                                                 |                                  |                                      |                            |



**Supplementary Table 4. Summary of morphological traits (body size and body shape) used in this study.** Minimum and maximum size values were collected from Weigman (2006)<sup>8</sup> if not stated otherwise in the reference column. Body shape (ratio of length/width) was obtained by measuring drawings of species from literature. If sequences were not assigned to species (i.e., sp.) or the exact species was not available as drawing, measurements were taken from a congeneric species as listed in the column references. Sequences of the species of the genus *Haplozetes* were not available at GenBank and were replaced by species of the genus *Rostrozetes*.

| infraorder                           | species (available 18S sequence)  | body size [ $\mu\text{m}$ ] |         |         |          | body form                | reference                           |
|--------------------------------------|-----------------------------------|-----------------------------|---------|---------|----------|--------------------------|-------------------------------------|
|                                      |                                   | mean                        | minimum | maximum | variance | (ratio=<br>length/width) |                                     |
| Brachypylina (higher oribatid mites) | <i>Achipteria_coleoptrata</i>     | 590                         | 530     | 650     | 120      | 1.41                     |                                     |
|                                      | <i>Anachipteria_sp</i>            | 690                         | 600     | 780     | 180      | 1.38                     | <i>Anachipteria nitens</i>          |
|                                      | <i>Lepidozetes_singularis</i>     | 460                         | 415     | 505     | 90       | 1.53                     |                                     |
|                                      | <i>Caleremaeus_monilipes</i>      | 355                         | 330     | 380     | 50       | 1.82                     |                                     |
|                                      | <i>Carabodes_coriaceus</i>        | 645                         | 565     | 725     | 160      | 1.43                     |                                     |
|                                      | <i>Carabodes_labyrinthicus</i>    | 505                         | 430     | 580     | 150      | 1.71                     |                                     |
|                                      | <i>Carabodes_subarcticus</i>      | 445                         | 400     | 490     | 90       | 1.84                     |                                     |
|                                      | <i>Odontocephus_elongatus</i>     | 655                         | 525     | 785     | 260      | 2.18                     |                                     |
|                                      | <i>Tectocephus_minor</i>          | 280                         | 220     | 340     | 120      | 1.73                     | Dogan & Ayyildiz 2000 <sup>25</sup> |
|                                      | <i>Tectocephus_sarekensis</i>     | 327.5                       | 295     | 360     | 65       | 1.71                     | Knülle 1953 <sup>26</sup>           |
|                                      | <i>Tectocephus_velatus</i>        | 300                         | 280     | 320     | 40       | 1.74                     | Dogan & Ayyildiz 2000 <sup>25</sup> |
|                                      | <i>Cepheus_dentatus</i>           | 795                         | 750     | 840     | 90       | 1.44                     |                                     |
|                                      | <i>Cepheus_latus</i>              | 785                         | 670     | 900     | 230      | 1.35                     |                                     |
|                                      | <i>Edwardzetes_edwardsi</i>       | 770                         | 680     | 860     | 180      | 1.35                     |                                     |
|                                      | <i>Oromurcia_sudetica</i>         | 677.5                       | 630     | 725     | 95       | 1.3                      |                                     |
|                                      | <i>Trichoribates_trimaculatus</i> | 620                         | 560     | 680     | 120      | 1.5                      | <i>Trichoribates novus</i>          |
|                                      | <i>Chamobates_pusillus</i>        | 420                         | 370     | 470     | 100      | 1.38                     |                                     |
|                                      | <i>Chamobates_subglobulus</i>     | 685                         | 630     | 740     | 110      | 1.26                     |                                     |
|                                      | <i>Chamobates_voigtsi</i>         | 350                         | 320     | 380     | 60       | 1.25                     |                                     |
|                                      | <i>Euzetes_globulus</i>           | 1115                        | 1070    | 1160    | 90       | 1.28                     |                                     |
|                                      | <i>Humerobates_rostromellata</i>  | 747.5                       | 655     | 840     | 185      | 1.33                     |                                     |
|                                      | <i>Mycobates_parmeliae</i>        | 462.5                       | 410     | 515     | 105      | 1.53                     |                                     |
|                                      | <i>Punctoribates_punctum</i>      | 380                         | 350     | 410     | 60       | 1.39                     |                                     |
|                                      | <i>Cymbaeremaeus_cymba</i>        | 745                         | 690     | 800     | 110      | 1.68                     |                                     |
|                                      | <i>Scapheremaeus_palustris</i>    | 465                         | 450     | 480     | 30       | 1.91                     |                                     |
|                                      | <i>Damaeobelba_minutissima</i>    | 272.5                       | 260     | 285     | 25       | 1.32                     |                                     |
|                                      | <i>Damaeus_flagelloides</i>       | 935                         | 830     | 1040    | 210      | 1.46                     |                                     |



**Supplementary Table 4** continued

|                                   |        |      |      |     |      |                                 |
|-----------------------------------|--------|------|------|-----|------|---------------------------------|
| <i>Metabelba_papilles</i>         | 465    | 410  | 520  | 110 | 1.63 |                                 |
| <i>Parabelbella_meridiana</i>     | 364.5  | 348  | 381  | 33  | 1.67 |                                 |
| <i>Eueremaeus_oblongus</i>        | 590    | 560  | 620  | 60  | 1.97 | <i>Eueremaeus silvestris</i>    |
| <i>Acrogalumna_longipluma</i>     | 707.5  | 625  | 790  | 165 | 1.19 |                                 |
| <i>Galumna_lanceata</i>           | 600    | 530  | 670  | 140 | 1.42 |                                 |
| <i>Pilogalumna_rosauraruizae</i>  | 525    | 500  | 550  | 50  | 1.4  | <i>Pilogalumna crassiclava</i>  |
| <i>Adoristes_ovatus</i>           | 537.5  | 490  | 585  | 95  | 1.54 |                                 |
| <i>Liacarus_coracinus</i>         | 875    | 650  | 1100 | 450 | 1.75 |                                 |
| <i>Haffenrefferia_gilvipes</i>    | 920    | 870  | 970  | 100 | 1.52 |                                 |
| <i>Xenillus_discrepans</i>        | 1007.5 | 860  | 1155 | 295 | 1.54 |                                 |
| <i>Xenillus_tegeocranus</i>       | 910    | 720  | 1100 | 380 | 1.56 |                                 |
| <i>Ceratoppia_bipilis</i>         | 800    | 700  | 900  | 200 | 1.55 |                                 |
| <i>Gymnodamaeus_bicostatus</i>    | 695    | 660  | 730  | 70  | 1.78 |                                 |
| <i>Ampullobates_ecuadoriensis</i> | 688.5  | 664  | 713  | 49  | 1.56 |                                 |
| <i>Hermannobates_monstruosus</i>  | 730    | 697  | 763  | 66  | 1.56 |                                 |
| <i>Hydrozetes_lacustris</i>       | 480    | 450  | 510  | 60  | 1.55 |                                 |
| <i>Limnozetes_foveolatus</i>      | 300    | 270  | 330  | 60  | 1.61 | <i>Limnozetes ciliatus</i>      |
| <i>Limnozetes_rugosus</i>         | 357.5  | 350  | 365  | 15  | 1.44 |                                 |
| <i>Scutovertex_sculptus</i>       | 625    | 590  | 660  | 70  | 1.7  |                                 |
| <i>Poroliodes_farinosus</i>       | 1050   | 1000 | 1100 | 100 | 1.8  |                                 |
| <i>Disorrhina_ornata</i>          | 300    | 250  | 350  | 100 | 1.84 |                                 |
| <i>Oppiella_nasuta</i>            | 292.5  | 285  | 300  | 15  | 1.69 |                                 |
| <i>Oppiella_nova</i>              | 270    | 220  | 320  | 100 | 1.83 |                                 |
| <i>Oppiella_splendens</i>         | 320    | 320  |      |     | 1.68 | <i>Oppiella escotata</i>        |
| <i>Banksinoma_lanceolata</i>      | 330    | 300  | 360  | 60  | 1.59 |                                 |
| <i>Peloribates_acutus</i>         | 440    | 390  | 490  | 100 | 1.61 | <i>Peloribates europaeus</i>    |
| <i>Rostrozetes_fove_ovo</i>       | 442    | 415  | 469  | 54  | 1.53 | <i>Haplozetes vindobonensis</i> |
| <i>Rostrozetes_Kansas02</i>       | 416.5  | 405  | 428  | 23  | 1.54 | <i>Haplozetes elegans</i>       |
| <i>Rostrozetes_ovulum</i>         | 452.5  | 426  | 479  | 53  | 1.49 | <i>Haplozetes tenuifusus</i>    |
| <i>Hemileius_microclava</i>       | 376    | 335  | 417  | 82  | 1.62 |                                 |
| <i>Liebstadia_humerata</i>        | 345    | 310  | 380  | 70  | 2.11 |                                 |
| <i>Oribatula_tibialis</i>         | 470    | 410  | 530  | 120 | 1.83 |                                 |
| <i>Phauloppia_lucorum</i>         | 750    | 600  | 900  | 300 | 1.57 |                                 |



**Supplementary Table 4** continued

|                                    |                                |       |      |      |      |                                              |                                                                                                                                                  |
|------------------------------------|--------------------------------|-------|------|------|------|----------------------------------------------|--------------------------------------------------------------------------------------------------------------------------------------------------|
| <b>Brachy-<br/>pylina</b>          | <i>Protoribates_hakonensis</i> | 380   | 320  | 440  | 120  | 1.81                                         |                                                                                                                                                  |
|                                    | <i>Scheloribates_ascendens</i> | 495   | 445  | 545  | 100  | 1.62                                         |                                                                                                                                                  |
|                                    | <i>Eupelops_hirtus</i>         | 975   | 850  | 1100 | 250  | 1.26                                         |                                                                                                                                                  |
|                                    | <i>Eupelops_plicatus</i>       | 590   | 500  | 680  | 180  | 1.52                                         |                                                                                                                                                  |
| <b>Desmonomata</b>                 | <i>Camisia_horrida</i>         | 892.5 | 825  | 960  | 135  | 2.13                                         |                                                                                                                                                  |
|                                    | <i>Camisia_invenusta</i>       | 735   | 670  | 800  | 130  | 1.96                                         |                                                                                                                                                  |
|                                    | <i>Camisia_segnis</i>          | 865   | 830  | 900  | 70   | 2.18                                         |                                                                                                                                                  |
|                                    | <i>Heminothrus_capillatus</i>  | 1010  | 960  | 1060 | 100  | 1.93                                         | <i>Platynothrus capillatus</i>                                                                                                                   |
|                                    | <i>Heminothrus_paolianus</i>   | 660   | 640  | 680  | 40   | 2                                            | <i>Heminothrus paolianus longisetosus</i>                                                                                                        |
|                                    | <i>Platynothrus_peltifer</i>   | 875   | 770  | 980  | 210  | 1.74                                         |                                                                                                                                                  |
|                                    | <i>Nothrus_silvestris</i>      | 760   | 710  | 810  | 100  | 1.94                                         |                                                                                                                                                  |
|                                    | <i>Hermannia_gibba</i>         | 860   | 780  | 940  | 160  | 1.57                                         |                                                                                                                                                  |
|                                    | <i>Masthermannia_sp</i>        | 442.5 | 400  | 485  | 85   | 2.47                                         | <i>Masthermannia mammillaris</i>                                                                                                                 |
|                                    | <i>Nanhermannia_coronata</i>   | 525   | 480  | 570  | 90   | 2.48                                         |                                                                                                                                                  |
|                                    | <i>Nanhermannia_nana</i>       | 587.5 | 550  | 625  | 75   | 2.5                                          |                                                                                                                                                  |
|                                    | <i>Malacothonrus_gracilis</i>  | 415   | 375  | 455  | 80   | 2.24                                         | <i>Malacothonrus monodactylus</i>                                                                                                                |
|                                    | <i>Trimalaconothrus_sp</i>     | 525   | 476  | 574  | 98   | 2.05                                         | mean: <i>T. glaber</i> , <i>T. angulatus</i> , <i>T. maior</i> , <i>T. foveolatus</i> , <i>T. tardus</i> , <i>T. sculptus</i> , <i>T. vietsi</i> |
|                                    | <i>Mucronothrus_nasalis</i>    | 690   | 580  | 800  | 220  | 2.08                                         |                                                                                                                                                  |
| <i>Trhypochthoniellus_crassus</i>  | 507.5                          | 435   | 580  | 145  | 1.83 | mean: <i>T. longiseta</i> , <i>T. setosa</i> |                                                                                                                                                  |
| <i>Trhypochthonius_cladonicola</i> | 540                            | 530   | 550  | 20   | 1.88 |                                              |                                                                                                                                                  |
| <i>Trhypochthonius_tectorum</i>    | 677.5                          | 580   | 775  | 195  | 1.82 |                                              |                                                                                                                                                  |
| <b>Mixonomata</b>                  | <i>Collohmanna_gigantes</i>    | 1535  | 1450 | 1620 | 170  | 1.9                                          |                                                                                                                                                  |
|                                    | <i>Epilohmannia_sp</i>         | 512.5 | 450  | 575  | 125  | 2.5                                          |                                                                                                                                                  |
|                                    | <i>Eulomannia_ribagai</i>      | 665   | 600  | 730  | 130  | 3.07                                         |                                                                                                                                                  |
|                                    | <i>Rhysotritia_duplicata</i>   | 580   | 560  | 600  | 40   | 1.28                                         |                                                                                                                                                  |
|                                    | <i>Perlohmanna_sp</i>          | 702.5 | 625  | 780  | 155  | 2.63                                         | <i>Perlohmanna nasuta</i>                                                                                                                        |
|                                    | <i>Phthiracarus_sp</i>         | 400   | 330  | 470  | 140  | 1.45                                         | <i>Phthiracarus anonymys</i> (Grandjean 1934) <sup>27</sup>                                                                                      |
|                                    | <i>Atropacarus_striculus</i>   | 465   | 340  | 590  | 250  | 1.62                                         | Kamill & Baker 1980 <sup>28</sup>                                                                                                                |
|                                    | <i>Steganacarus_applicatus</i> | 750   | 740  | 760  | 20   | 1.42                                         | Bernini & Avanzati 1989 <sup>29</sup>                                                                                                            |
|                                    | <i>Steganacarus_magnus</i>     | 950   | 700  | 1200 | 500  | 1.58                                         | <i>Steganacarus magna forma magnus</i> (Bernini & Avanzati 1988) <sup>30</sup>                                                                   |



**Supplementary Table 4** continued

|                            |                                        |       |      |     |      |                                                      |                                      |
|----------------------------|----------------------------------------|-------|------|-----|------|------------------------------------------------------|--------------------------------------|
| <b>Enarthronota</b>        | <i>Atopochthonius_artiodactylus</i>    | 200   | 200  |     |      | 1.59                                                 |                                      |
|                            | <i>Pterochthonius_angelus</i>          | 400   | 350  | 450 | 100  | 1.51                                                 |                                      |
|                            | <i>Brachychthonius_bimaculatus</i>     | 165   | 157  | 173 | 16   | 2.5                                                  |                                      |
|                            | <i>Eobrachychthonius_sexnotatus</i>    | 302.5 | 270  | 335 | 65   | 1.53                                                 | <i>Eobrachychthonius latior</i>      |
|                            | <i>Liochthonius_neglectus</i>          | 193.5 | 182  | 205 | 23   | 2.03                                                 |                                      |
|                            | <i>Liochthonius_peduncularius</i>      | 205   | 200  | 210 | 10   | 1.49                                                 |                                      |
|                            | <i>Neoliochthonius_piluliferus</i>     | 194.5 | 123  | 266 | 143  | 2.18                                                 |                                      |
|                            | <i>Sellnickochthonius_cricoides</i>    | 150   | 135  | 165 | 30   | 2.03                                                 |                                      |
|                            | <i>Sellnickochthonius_immaculatus</i>  | 182.5 | 170  | 195 | 25   | 2.03                                                 |                                      |
|                            | <i>Sellnickochthonius_zelawaiensis</i> | 159   | 148  | 170 | 22   | 2.03                                                 |                                      |
|                            | <i>Cosmochthonius_lanatus</i>          | 175   | 170  | 180 | 10   | 1.78                                                 |                                      |
|                            | <i>Sphaerochthonius_sp</i>             | 292.5 | 275  | 310 | 35   | 1.46                                                 | <i>Sphaerochchthonius splendidus</i> |
|                            | <i>Eniochthonius_minutissimus</i>      | 375   | 370  | 380 | 10   | 2.03                                                 |                                      |
|                            | <i>Hypochthonius_luteus</i>            | 615   | 580  | 650 | 70   | 1.97                                                 |                                      |
|                            | <i>Hypochthonius_rufulus</i>           | 675   | 650  | 700 | 50   | 1.76                                                 |                                      |
|                            | <i>Lohmannia_banksi_E</i>              | 1000  | 1000 |     |      | 2.16                                                 | <i>Lohmannia paradoxa</i>            |
| <i>Mesoplophora_cubana</i> | 435                                    | 420   | 450  | 30  | 1.45 | <i>Mesoplophora aficana</i> (Els 1966) <sup>31</sup> |                                      |
| <b>Parhypo-<br/>somata</b> | <i>Gehypochthonius_urticinus</i>       | 267.5 | 260  | 275 | 15   | 2.61                                                 | <i>Gehypochthonius rhadamanthus</i>  |
|                            | <i>Parhypochthonius_aphidinus</i>      | 435   | 350  | 520 | 170  | 2.37                                                 |                                      |
| <b>Palaeo-<br/>somata</b>  | <i>Aphelacarus_sp</i>                  | 440   | 440  |     |      | 2.74                                                 | <i>Aphelacarus acarinus</i>          |
|                            | <i>Ctenacarus_araneola</i>             | 367.5 | 360  | 375 | 15   | 2.12                                                 |                                      |
|                            | <i>Palaeacarus_hystricinus</i>         | 360   | 340  | 380 | 40   | 2.64                                                 | Schatz 2004 <sup>32</sup>            |



**Supplementary Table 5. Trophic traits used in this study and list of taxa for which stable isotope data were available.** Data are from four 4 habitats<sup>33-38</sup> to cover a wide taxon sampling (in total 70 species) which covers most species from the morphological trait dataset and phylogeny (in total 103 species). Trophic levels were assigned based on <sup>15</sup>N values within communities (to account for site specific differences of the baseline values of <sup>13</sup>C and <sup>15</sup>N, which can geographically strongly differ) and categorized into four, very general functional groups. Within each trophic level, species were hierarchical assigned to their <sup>15</sup>N position within their community. For better visualisation in the graph showing the distribution of trophic traits along the phylogeny, we added the factor 28 to <sup>13</sup>C and the factor 8 to <sup>15</sup>N values to obtain only positive values, which are also listed in this table. Species are listed from lowest to highest trophic levels and include Brachypylyna (n=49), Desmonomata (n=12), Mixonomata (n=6) and Enarthronota (n=3, including a single measurement for Brachychthoniidae).

| infraorder   | species                            | <sup>13</sup> C | <sup>15</sup> N | <sup>13</sup> C + 28 | <sup>15</sup> N + 8 | trophic level | functional group   |
|--------------|------------------------------------|-----------------|-----------------|----------------------|---------------------|---------------|--------------------|
| Brachypylyna | <i>Carabodes_labyrinthicus</i>     | 1.78            | -4.34           | 29.78                | 3.66                | 0             | specialist         |
| Brachypylyna | <i>Mycobates_parmeliae</i>         | -0.03           | -7.31           | 27.97                | 0.69                | 0.2           |                    |
| Brachypylyna | <i>Phauloppia_lucorum</i>          | -8.66           | -6.62           | 19.34                | 1.38                | 0.23          |                    |
| Brachypylyna | <i>Cymbaeremaeus_cymba</i>         | -24.23          | -5.06           | 3.77                 | 2.94                | 0.6           |                    |
| Brachypylyna | <i>Anachipteria_sp</i>             | 3.34            | -1.57           | 31.34                | 6.43                | 0.99          |                    |
| Desmonomata  | <i>Camisia_invenusta</i>           | -25.31          | -4.64           | 2.69                 | 3.36                | 0.99          |                    |
| Desmonomata  | <i>Camisia_horrida</i>             | 4.46            | -0.57           | 32.46                | 7.43                | 1             | primary decomposer |
| Desmonomata  | <i>Hermannia_gibba</i>             | -24.4           | -4.23           | 3.6                  | 3.77                | 1             |                    |
| Brachypylyna | <i>Scutovertex_sculptus</i>        | 0.38            | 1.55            | 28.38                | 9.55                | 1             |                    |
| Enarthronota | <i>Neoliochthonius_piluliferus</i> | 1.75            | 2.98            | 29.75                | 10.98               | 1.13          |                    |
| Brachypylyna | <i>Euzetes_globulus</i>            | 4.87            | 0.92            | 32.87                | 8.92                | 1.18          |                    |
| Brachypylyna | <i>Carabodes_subarcticus</i>       | 6.8             | 1.17            | 34.8                 | 9.17                | 1.36          |                    |
| Brachypylyna | <i>Tectocephus_sarekensis</i>      | -0.08           | 2.98            | 27.92                | 10.98               | 1.36          |                    |
| Mixonomata   | <i>Steganacarus_applicatus</i>     | 21.75           | -2.67           | 49.75                | 5.33                | 1.37          |                    |
| Brachypylyna | <i>Limnozetes_foveolatus</i>       | 1.98            | 3.63            | 29.98                | 11.63               | 1.38          |                    |
| Mixonomata   | <i>Epilohmannia_sp</i>             | 3.15            | 3.79            | 31.15                | 11.79               | 1.44          |                    |
| Brachypylyna | <i>Chamobates_pusillus</i>         | 4.17            | 1.42            | 32.17                | 9.42                | 1.45          |                    |
| Brachypylyna | <i>Achipteria_coleoprata</i>       | 1.07            | 3.23            | 29.07                | 11.23               | 1.5           |                    |
| Brachypylyna | <i>Hydrozetes_lacustris</i>        | 2.95            | 6.47            | 30.95                | 14.47               | 1.5           |                    |

**Supplementary Table 5** continued

|                |                                   |        |       |       |       |      |                           |                             |
|----------------|-----------------------------------|--------|-------|-------|-------|------|---------------------------|-----------------------------|
| Desmonomata    | <i>Malaconothrus_gracilis</i>     | 1.62   | 1.98  | 29.62 | 9.98  | 1.6  | <b>primary decomposer</b> |                             |
| Mixonomata     | <i>Steganacarus_magnus</i>        | 8.06   | 2.47  | 36.06 | 10.47 | 1.64 |                           |                             |
| Desmonomata    | <i>Camisia_segnis</i>             | -26.37 | -3.31 | 1.63  | 4.69  | 1.67 |                           |                             |
| Enarthronota   | <i>Eniochthonius_minutissimus</i> | -2.09  | -1.31 | 25.91 | 6.69  | 1.67 |                           |                             |
| Brachypylylina | <i>Oromurcia_sudetica</i>         | 5.52   | 1.4   | 33.52 | 9.4   | 1.67 |                           |                             |
| Brachypylylina | <i>Scheloribates_ascendens</i>    | -0.18  | -0.87 | 27.82 | 7.13  | 1.71 |                           |                             |
| Desmonomata    | <i>Platynothrus_peltifer</i>      | -4.46  | -1.45 | 23.54 | 6.55  | 1.75 |                           |                             |
| Desmonomata    | <i>Nanhermannia_nana</i>          | 2.08   | 1.57  | 30.08 | 9.57  | 1.76 |                           |                             |
| Brachypylylina | <i>Galumna_lanceata</i>           | 1.72   | 4.42  | 29.72 | 12.42 | 1.89 |                           |                             |
| Brachypylylina | <i>Liacarus_coracinus</i>         | -11.19 | 1.09  | 16.81 | 9.09  | 1.98 |                           |                             |
| Desmonomata    | <i>Nothrus_silvestris</i>         | 4.67   | 2.92  | 32.67 | 10.92 | 1.99 |                           |                             |
| Brachypylylina | <i>Metabelba_papilles</i>         | 2.05   | 5.98  | 30.05 | 13.98 | 2    |                           | <b>secondary decomposer</b> |
| Mixonomata     | <i>Rhysotritia_duplicata</i>      | 5.71   | 3.12  | 33.71 | 11.12 | 2    |                           |                             |
| Brachypylylina | <i>Edwardzetes_edwardsi</i>       | -27.56 | -2.41 | 0.44  | 5.59  | 2.07 |                           |                             |
| Brachypylylina | <i>Hermannobates_monstruosus</i>  | -0.72  | -0.41 | 27.28 | 7.59  | 2.13 |                           |                             |
| Brachypylylina | <i>Eueremaeus_oblongus</i>        | -12.93 | -1.1  | 15.07 | 6.9   | 2.14 |                           |                             |
| Brachypylylina | <i>Liebstadia_humerata</i>        | -0.35  | 1.57  | 27.65 | 9.57  | 2.25 |                           |                             |
| Brachypylylina | <i>Oribatula_tibialis</i>         | -0.35  | 1.57  | 27.65 | 9.57  | 2.25 |                           |                             |
| Brachypylylina | <i>Rostrozetes_fove_ovo</i>       | 2.61   | 5.66  | 30.61 | 13.66 | 2.25 |                           |                             |
| Brachypylylina | <i>Ceratoppia_bipilis</i>         | -12.25 | -2.02 | 15.75 | 5.98  | 2.29 |                           |                             |
| Brachypylylina | <i>Odontocephelus_elongatus</i>   | 5.75   | 3.49  | 33.75 | 11.49 | 2.29 |                           |                             |
| Brachypylylina | <i>Caleremaeus_monilipes</i>      | -12.6  | -2.3  | 15.4  | 5.7   | 2.32 |                           |                             |
| Brachypylylina | <i>Punctoribates_punctum</i>      | 2.54   | 5.93  | 30.54 | 13.93 | 2.42 |                           |                             |
| Brachypylylina | <i>Cepheus_latus</i>              | -23.22 | -1.81 | 4.78  | 6.19  | 2.43 |                           |                             |
| Brachypylylina | <i>Eupelops_plicatus</i>          | 1.83   | 6     | 29.83 | 14    | 2.5  |                           |                             |
| Desmonomata    | <i>Heminothrus_paolianus</i>      | -1.35  | 1.61  | 26.65 | 9.61  | 2.54 |                           |                             |
| Brachypylylina | <i>Xenillus_tegeocranus</i>       | 0.38   | 1.6   | 28.38 | 9.6   | 2.55 |                           |                             |
| Brachypylylina | <i>Pilogalumna_rosauraruizae</i>  | 1.95   | 5.14  | 29.95 | 13.14 | 2.56 |                           |                             |
| Brachypylylina | <i>Protoribates_hakonensis</i>    | -2.31  | 5.2   | 25.69 | 13.2  | 2.56 |                           |                             |
| Brachypylylina | <i>Chamobates_subglobulus</i>     | 2.2    | 6.43  | 30.2  | 14.43 | 2.58 |                           |                             |
| Brachypylylina | <i>Acrogalumna_longipluma</i>     | -10.09 | 1.78  | 17.91 | 9.78  | 2.64 |                           |                             |
| Mixonomata     | <i>Atropacarus_striculus</i>      | 4.6    | 2.15  | 32.6  | 10.15 | 2.66 |                           |                             |
| Brachypylylina | <i>Eupelops_hirtus</i>            | 1.68   | 6.44  | 29.68 | 14.44 | 2.67 |                           |                             |



**Supplementary Table 5** continued

|                |                                   |        |       |       |       |      |                         |
|----------------|-----------------------------------|--------|-------|-------|-------|------|-------------------------|
| Brachypylylina | <i>Chamobates_voigtsi</i>         | -24.07 | -0.76 | 3.93  | 7.24  | 2.71 | secondary<br>decomposer |
| Desmonomata    | <i>Nanhermannia_coronata</i>      | 5      | 4.74  | 33    | 12.74 | 2.71 |                         |
| Brachypylylina | <i>Tectocephus_minor</i>          | 1.62   | 6.62  | 29.62 | 14.62 | 2.75 |                         |
| Mixonomata     | <i>Phthiracarus_sp</i>            | -20.93 | -0.69 | 7.07  | 7.31  | 2.79 |                         |
| Enarthronota   | <i>Hypochthonius_rufulus</i>      | 1.92   | 4.96  | 29.92 | 12.96 | 2.87 |                         |
| Brachypylylina | <i>Disorrhina_ornata</i>          | 1.93   | 6.83  | 29.93 | 14.83 | 2.92 |                         |
| Brachypylylina | <i>Oppiella_nova</i>              | 2.57   | 7.15  | 30.57 | 15.15 | 2.99 |                         |
| Brachypylylina | <i>Oppiella_splendens</i>         | 3.53   | 6.04  | 31.53 | 14.04 | 2.99 |                         |
| Brachypylylina | <i>Damaeus_flagelloides</i>       | -23.68 | 1.18  | 4.32  | 9.18  | 3    | predator/scavenger      |
| Brachypylylina | <i>Tectocephus_velatus</i>        | 1.55   | 1.9   | 29.55 | 9.9   | 3    |                         |
| Brachypylylina | <i>Trichoribates_trimaculatus</i> | 6.85   | 7.39  | 34.85 | 15.39 | 3    |                         |
| Brachypylylina | <i>Oppiella_nasuta</i>            | 3.81   | 6.54  | 31.81 | 14.54 | 3.2  |                         |
| Brachypylylina | <i>Xenillus_discrepans</i>        | 1.29   | 2.95  | 29.29 | 10.95 | 3.23 |                         |
| Desmonomata    | <i>Trimalaconothrus_sp</i>        | 0.67   | 3.14  | 28.67 | 11.14 | 3.49 |                         |
| Brachypylylina | <i>Carabodes_coriaceus</i>        | -21.74 | 1.65  | 6.26  | 9.65  | 3.5  |                         |
| Brachypylylina | <i>Damaeobelba_minutissima</i>    | 2.2    | 7.45  | 30.2  | 15.45 | 3.5  |                         |
| Desmonomata    | <i>Trhypochthoniellus_crassus</i> | 2.38   | 3.94  | 30.38 | 11.94 | 3.5  |                         |
| Brachypylylina | <i>Limnozetes_rugosus</i>         | 3.89   | 7.67  | 31.89 | 15.67 | 3.99 |                         |

## Supplementary References

1. Pachtl, P., Lindl, A. C., Krause, A., Scheu, S., Schaefer, I., Maraun, M. The tropics as ancient cradle of oribatid mite diversity. *Acarologia* 57, 309-322 (2017).
2. Schaefer, I., Norton, R. A., Scheu, S. & Maraun, M. Arthropod colonization of land – linking molecules and fossils in oribatid mites (Acari, Oribatida). *Mol. Phylogenet. Evol.* 57, 113-121 (2010).
3. Pepato, A. R. & Klimov, P. B. Origin and higher-level diversification of acariform mites – evidence from nuclear ribosomal genes, extensive taxon sampling, and secondary structure alignment. *BMC Evol. Biol.* 15, 178 (2015).
4. Krantz, G. W. & Proctor, D. E. in *A manual of Acarology*. eds Krantz GW and Walter DE (3rd edition, Texas Tech University Press 2009); chapter 15, pp. 430 ff.
5. Dabert, M., Witalinski, W., Kazmierski, A., Olszanowski, Z. & Dabert, J. Molecular phylogeny of acariform mites (Acari, Arachnida): strong conflict between phylogenetic signal and long-branch attraction artifacts. *Mol. Phylogenet. Evol.* 56, 222-241 (2010)
6. Klimov, P. B. & OConnor, B. Is permanent parasitism reversible? - critical evidence from early evolution of house dust mites. *Syst. Biol.* 62, 411-423 (2013).
7. Caruso, T. & Migliorini, M. Euclidean geometry explains why lengths allow precise body mass estimates in terrestrial invertebrates: the case of oribatid mites. *J Theor Biol*, **256**, 436-440 (2009).
8. Weigmann, G. Hornmilben (Oribatida) Die Tierwelt Deutschlands, 76. Teil. Goecke & Evers, Keltern (2006).
9. Grandjean, F. Essai de classification des Oribates (Acarieus). *Bull. Soc. Zool. Fr.* **78**, 421-446 (1954).
10. Grandjean F. Considération sur le classement des Oribates leur division en 6 groupes majeurs. *Acarologia* **11**, 127-153 (1969).
11. Schatz, H. Die Oribatidenliteratur und die beschriebenen Oribatidenarten (1758-2001): Eine Analyse. *Abh. Ber. Naturk. Görlitz* **74**, 37-45 (2002).
12. Krivolutsky, D. A. & Krassilov, V. A. *Oribatid mites from Upper Jurassic, USSR*. In: Skarlato OA, Balasho S (Eds.), Morphology and diagnostics of mites. *Academy of Sciences of the USSR, Leningrad*, pp. 16-24 (1977).
13. Arillo, A., Subías, L. S. & Shtanchaeva, U. A new fossil oribatid mite, *Ommatocephus nortoni* sp. nov. (Acariformes, Oribatida, Cepheidae) from a new outcrop of lower Cretaceous Álava amber (northern Spain). *System. Appl. Acarol.* **13**, 252-255 (2008).
14. Sivhead, U. & Wallwork, J. A. An early Jurassic oribatid mite from southern Sweden. *Geol. Foren. Stock. For.* **100**, 65-70 (1978).
15. Bulanova-Zachvatkina, Y. M. A new genus of mite (Acariformes, Oribatei) from the upper Cretaceous of Taymyr. *Paleont. Journ.* **8**, 247-250 (1974).



16. Arillo, A., Subías, L. S. & Shtanchaeva, U. A new species of fossil oribatid mite (Acariformes, Oribatida, Trhypochthoniida) from the lower Cretaceous amber of San Just (Teruel Province, Spain). *System. Appl. Acarol.* **17**, 106-112 (2012).
17. Subías, L. S. & Arillo, A. Oribatid fossil mites from the upper Devonian of South Mountain, New York and the lower Carboniferous of County Antrim, North Ireland (Acariformes, Oribatida). *Estud. Museo Cienc. Nat. Álava* **17**, 93-106 (2002).
18. Norton, R. A., Bonamo, P. M., Crierson, J. D. & Shear, W. A. Oribatid mite fossils from a terrestrial deposit near Gilboa, New York. *J. Paleontol.* **62**, 259-269 (1988).
19. Shear, W. A., Bonamo, P. M., Grierson, J. D., Rolfe, W. D. I., Laidlaw Smith, E. & Norton, R. A. Early land animals in North America: evidence from Devonian age arthropods from Gilboa, New York. *Science* **224**, 492-494 (1984).
20. O'Dowd, D. J., Brew, C. R., Christophel, D. C. & Norton, R. A. Mite-plant associations from the Eocene of Southern Australia. *Science* **252**, 99-101 (1991).
21. Woolley, T. A. Fossil oribatid mites in amber from Chiapas, Mexico (Acarina: Oribatei: Cryptostigmata). *Univ. Calif. Publ. Entomol.* **63**, 91-99 (1971).
22. Mico, L. Oribatid mite fossils from pre-Quaternary sediments in Slovenian caves III. Two new species of *Dissorhina* (Oppiidae) from the Pliocene. *Acarologia* **55**, 449-457 (2015).
23. Norton, R. A. First record of *Collohmanna* (*C. schusteri* n. sp.) and *Hermannia* (*H. sellnicki* n. sp.) from Baltic amber, with notes on Sellnick's genera of fossil oribatid mites (Acari: Oribatida). *Acarologia* **46**, 111-125 (2006).
24. Labandeira, C. C., Phillips, T. L. & Norton, R. A. Oribatid mites and the decomposition of plant tissues in Paleozoic coal-swamp forests. *Palaios* **12**, 319-353 (1997).
25. Doğan, S. & Ayyıldız, N. Systematic investigation on *Tectocephus* Berlese, 1895 (Acari: Oribatida) species in Erzincan and Erzurum plains. *Türk. entomol. Der.* **24**, 69-80 (2000).
26. Knülle, W. Die Arten der Gattung *Tectocephus* Berlese (Acarina: Oribatei). *Zool. Anz.* **152**, 280-305 (1953).
27. Grandjean, F. *Phthiracarus anonymum*, n. sp. *Rev. Fr. Entomol.* **1**, 51-59 (1934).
28. Kamill, B. W. & Baker, A. The genus *Atropacarus* Ewing (Acari: Cryptostigmata). *Bull. Br. Mus. Nat. Hist. (Zool.)* **39**, 189-204 (1980).
29. Bernini, F. & Avanzati, A.M. Notulae oribatologicae xlix. taxonomic revision of *Steganacarus* (*Steganacarus*) *aplicatus* (Sellnick, 1920) and the description of a new west Mediterranean *Steganacarus* species (Acarida, Oribatida). *Int. J. Acarol.* **15**, 65-74 (1989).
30. Bernini, F. & Avanzati, A. M. Taxonomic revision of *Steganacarus* (*Steganacarus*) *magnus* (Nicolet, 1855) (Acarida, Oribatida). *J. Nat. Hist.* **22**, 435-464 (1988).
31. Els, A. J. Studies on the South African Oribatei Inferiores (Acarina) part 1: description of *Mesoplophora africana* (Balogh 1958). *S. Afr. J. Sci.* **62**, 76-79 (1966).

32. Schatz, H. *Palaeacarus hystricinus* Trägårdh, 1932 (Acari: Oribatida: Palaeacaridae), a remarkable oribatid mite from Tyrol. *Ber. nat.-med. Verein Innsbruck*, **91**, 339-340 (2004).
33. Erdmann, G., Otte, V., Langel, R., Scheu, S. & Maraun, M. The trophic structure of bark-living oribatid mite communities analysed with stable isotopes ( $^{15}\text{N}$ ,  $^{13}\text{C}$ ) indicates strong niche differentiation. *Exp. Appl. Acarol.* **41**, 1-10 (2007).
34. Lehmitz, R. & Maraun M. Small-scale spatial heterogeneity of stable isotopes signatures ( $\delta^{15}\text{N}$ ,  $\delta^{13}\text{C}$ ) in *Sphagnum* sp. Transfers to all trophic levels in oribatid mites. *Soil Biol. Biochem.* **100**, 242-251 (2016).
35. Maaß, S., Maraun, M., Scheu, D., Rillig, M. C. & Caruso, T. Environmental filtering vs. resource-based niche partitioning in diverse soil animal assemblages. *Soil Biol. Biochem.* **85**, 145-152 (2015).
36. Maraun, M., Erdmann, G., Fischer, B. M., Pollierer, M. M., Norton, R. A., Schneider, K. & Scheu, S. Stable isotopes revisited: Their use and limits for oribatid mite trophic ecology. *Soil Biol. Biochem.* **43**, 87-882 (2011).
37. Ilardi, M., Dick, J. T. A., Maraun, M. & Caruso, T. Response of native forest floor microarthropods to the invasive macroinvertebrate *Arcitalitrus dorrieni* (Crustacea; Amphipoda) (in preparation, 2019).
38. Magilton, M., Maraun, M., Emmerson, M. & Caruso, T. Oribatid mites reveal that competition for resources and trophic structure combine to regulate the assembly of diverse soil animal communities. (in preparation, 2019).
39. Original stable isotope data were obtained from the authors on request.
